# Supplementary material for: Megalochelin, a Tridecapeptide Siderophore from a Talented Streptomycete
Source: PubMed Central journal article supplement (PMC10127220; doi:10.1021/acschembio.2c00958), 2023-03-15
Supplement: cb2c00958_si_001.pdf [file cb2c00958_si_001.pdf]

## Supporting Information

### Megalochelin, a tridecapeptide siderophore from a talented streptomycete

Kristiina Vind<sup>\*,†,‡</sup>, Cristina Brunati<sup>†</sup>, Matteo Simone<sup>†</sup>, Margherita Sosio<sup>†</sup>, Stefano Donadio<sup>†</sup> and Marianna Iorio<sup>\*,†</sup>

<sup>†</sup> NAICONS Srl, 20139 Milan, Italy

<sup>‡</sup> Host-Microbe Interactomics Group, Wageningen University, 6708 WD Wageningen, The Netherlands

\* Corresponding authors

Kristiina Vind, email: [kristiina.vind@wur.nl](mailto:kristiina.vind@wur.nl)

Marianna Iorio, email: [miorio@naicons.com](mailto:miorio@naicons.com)

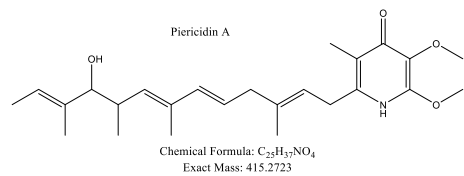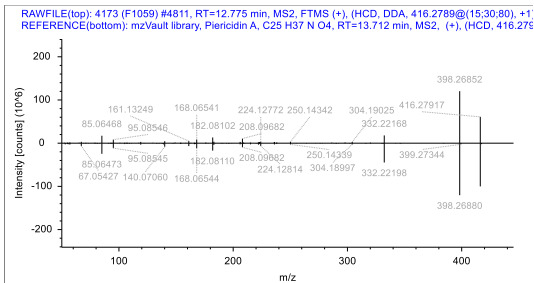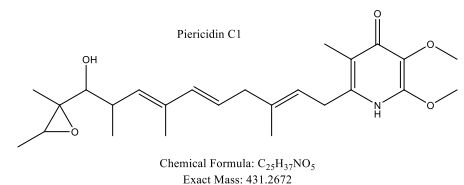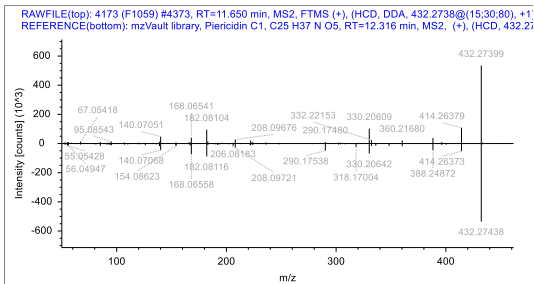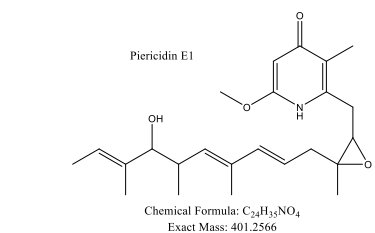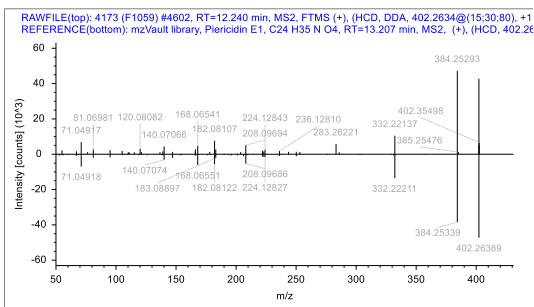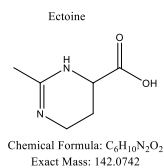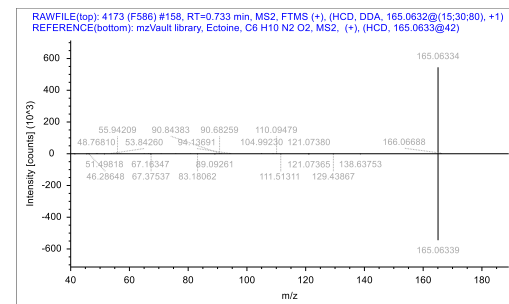

Azalomycin F3a: R1=R2=H  
Chemical Formula:  $C_{25}H_{43}N_3O_{17}$   
Exact Mass: 1067.6505

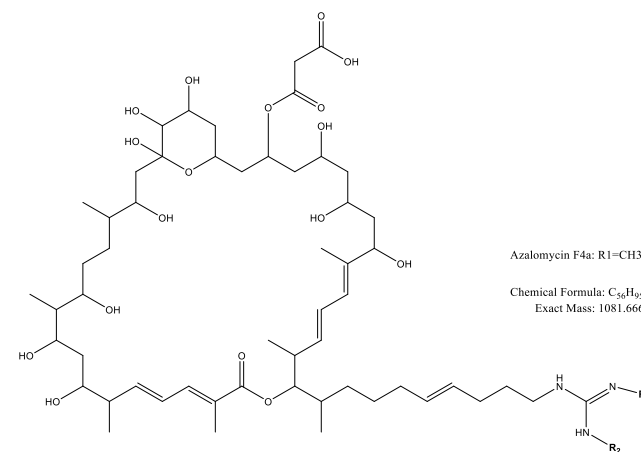

Azalomycin F5a: R1=R2=CH3  
Chemical Formula:  $C_{27}H_{47}N_3O_{17}$   
Exact Mass: 1095.6818

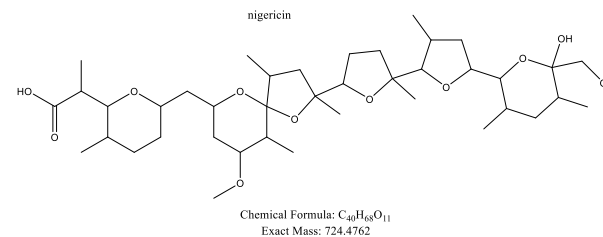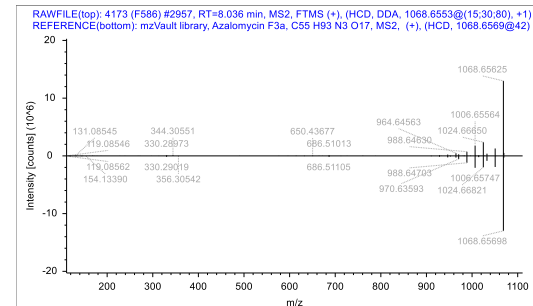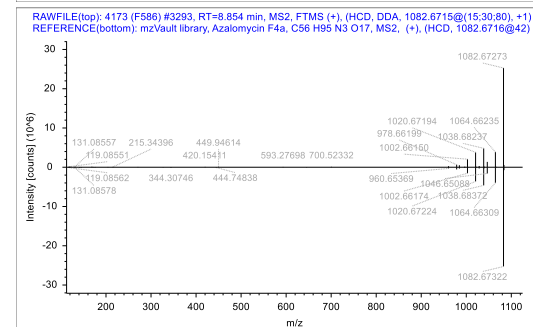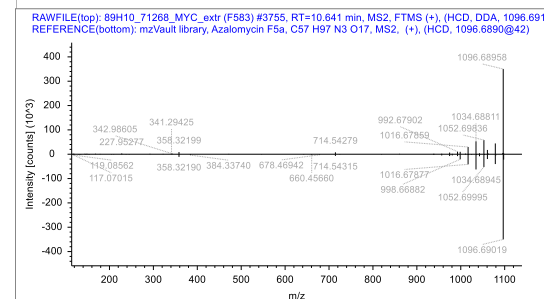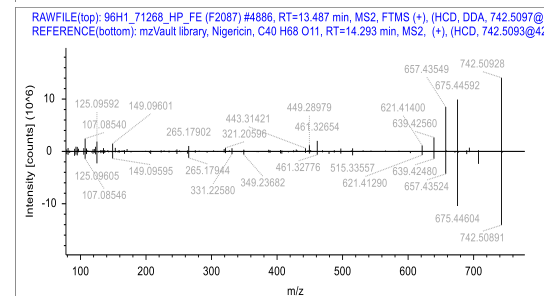

Figure S1. Selection of dereplicated metabolites identified mainly based on MS/MS fragmentation patterns. Left: name, structure, chemical formula and exact mass, right: their relative butterfly plots matching the authentic standard molecule. For all the reported structures stereochemistry is assumed to be as reported in Natural Product Atlas (<https://www.npatlas.org/>).

A

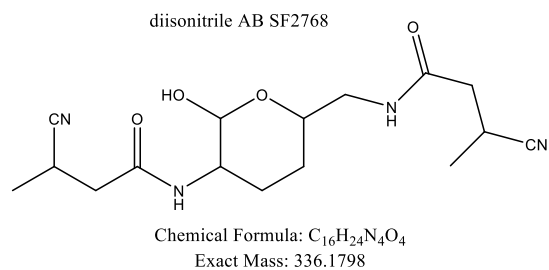

C

96H1\_71268\_HP\_FE #259 RT: 1.01 AV: 1 NL: 3.81E5  
T: FTMS + p ESI Full ms [150.0000-2000.0000]

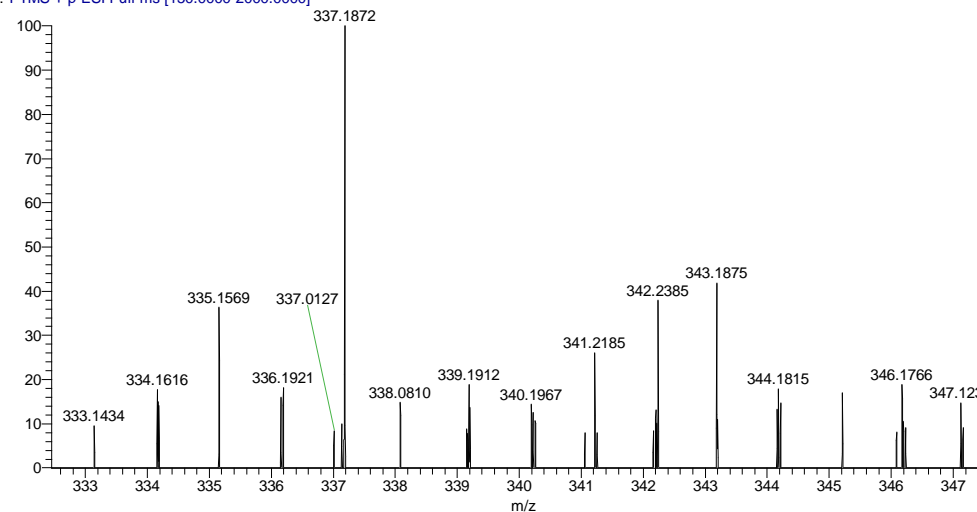

B

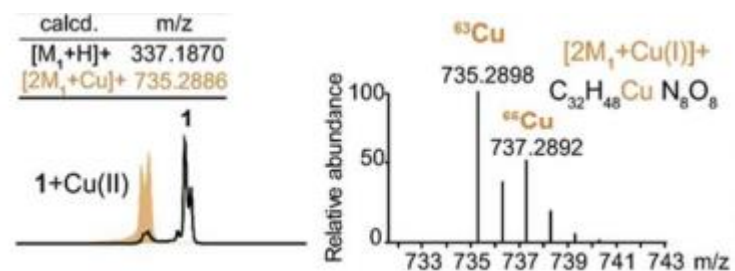

D

96H1\_71268\_HP\_FE #259 RT: 1.01 AV: 1 NL: 3.25E5  
T: FTMS + p ESI Full ms [150.0000-2000.0000]

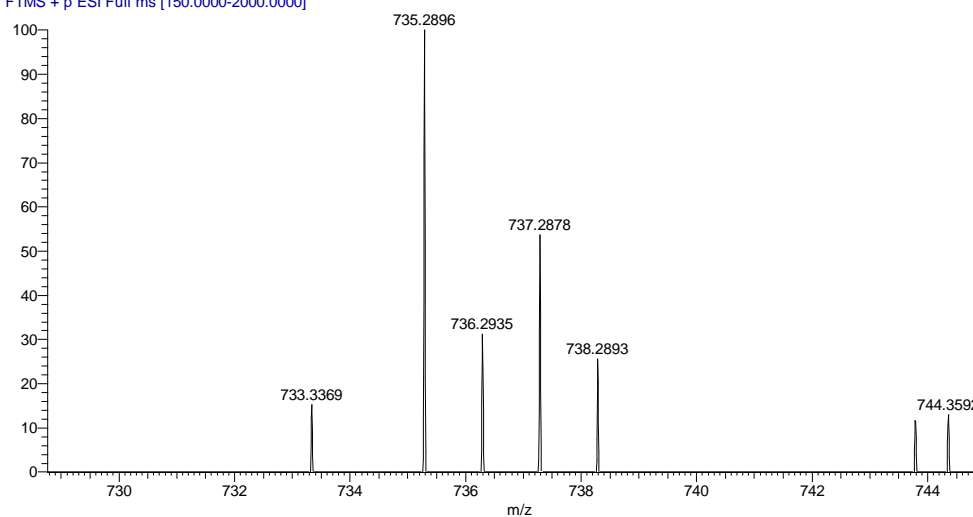

From: Wang L., et al. Diisonitrile Natural Product SF2768 Functions As a Chalkophore That Mediates Copper Acquisition in *Streptomyces thioluteus*. ACS Chem Biol. 2017 Dec 15;12(12):3067-3075. doi: 10.1021/acscchembio.7b00897. Epub 2017 Nov 22. PMID: 29131568.

Figure S2. DiisonitrileAB SF2768: A) structure; B) revisited figure 5 from Wang et al. (2017) showing the isotopic pattern of diisonitrileAB SF2768 complexed with Cu(I)+, C-D) HR full masses in positive ionization mode showing  $m/z$  337.1872 [M+H]<sup>+</sup> (C) and  $m/z$  735.2896 [2M+Cu(I)]<sup>+</sup> (D).

A

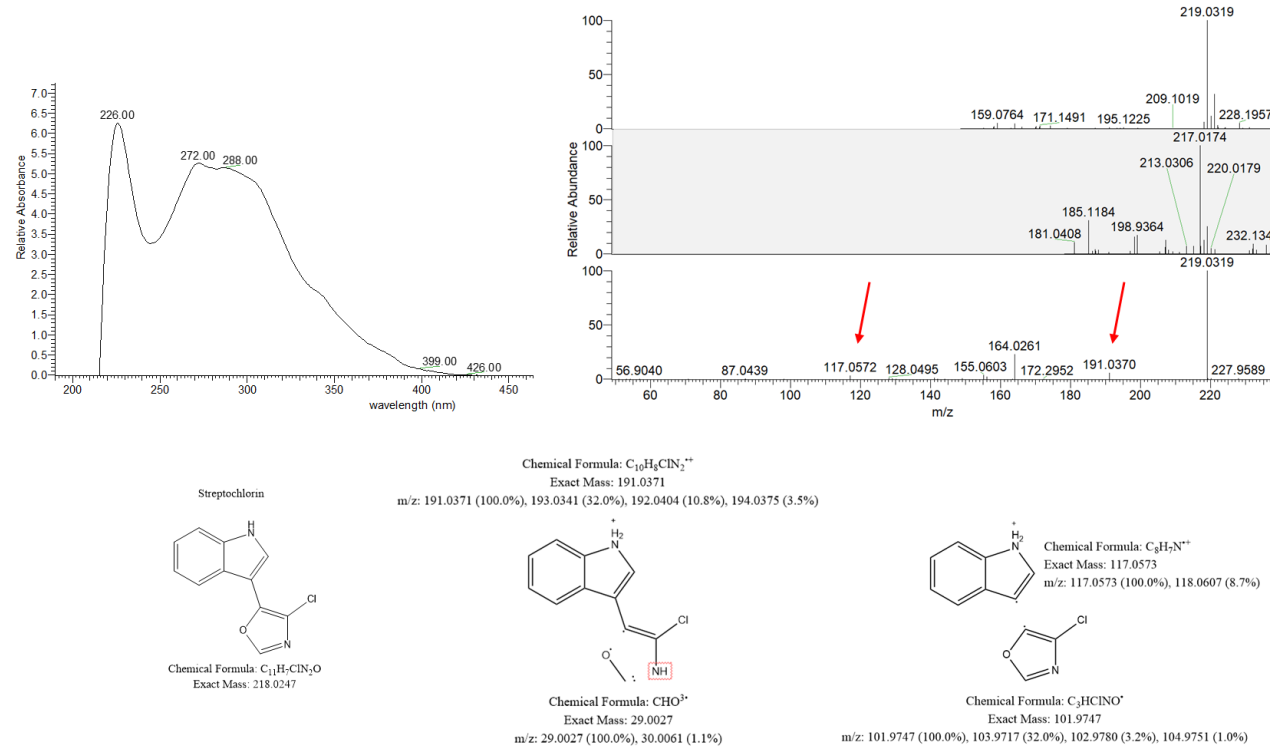

B

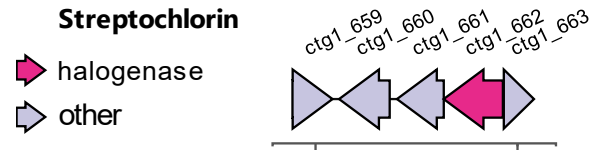

Figure S3. A) Identification of streptochlorin: top, left to right: UV spectrum of boxed area 3 in Fig. 2, MS spectra (from top to down): full mass in positive ionization mode, full mass in negative ionization mode and MS2 of  $m/z$  219.0319  $[M+H]^+$ , Bottom, structure of streptochlorin and predicted structures of MS fragments indicated by arrows. B) Predicted streptochlorine BGC from portion of Region 3 from Table 1. Genes are coloured as: pink, halogenase; grey, other biosynthetic functions. All genes are listed in Supplementary Table S2 (page S21).

A

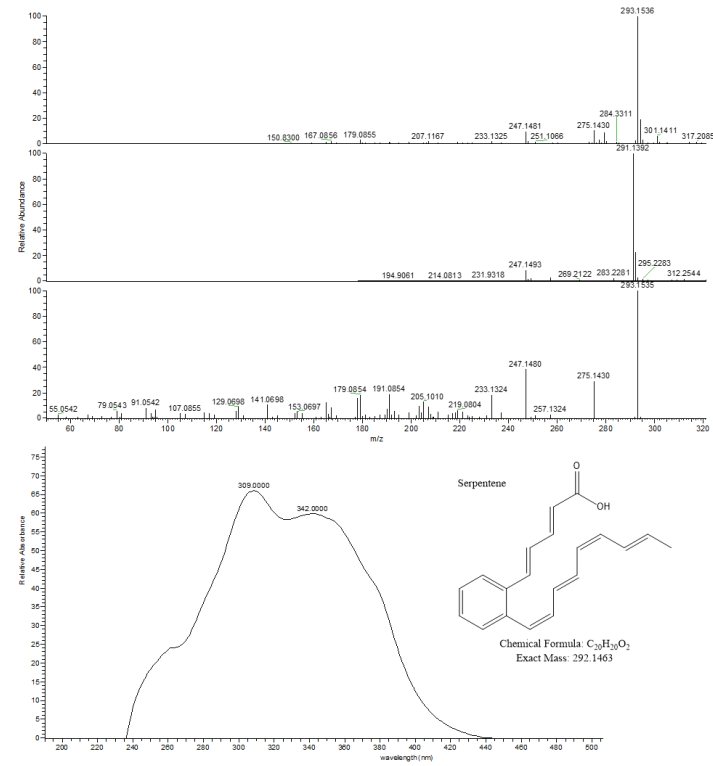

## B Serpentene

- regulatory
- FabA-like
- N-acetylglucosamine
- PKS modules
- beta-ketoacyl synthase
- alpha-beta hydrolase
- drug resistance transporter
- other

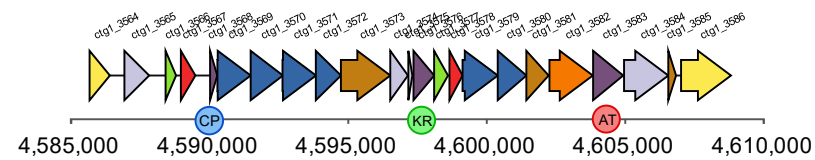

Figure S4. A) Identification of serpentene: top, MS spectra (from top to bottom): full mass in positive ionization mode, full mass in negative ionization mode and MS2 of  $m/z$  293.1535  $[M+H]^+$ , bottom, UV spectrum and serpentene structure. B) Predicted serpentene BGC from Region 18 of Table 1. All genes are listed in Supplementary Table S3 (page S22).

A

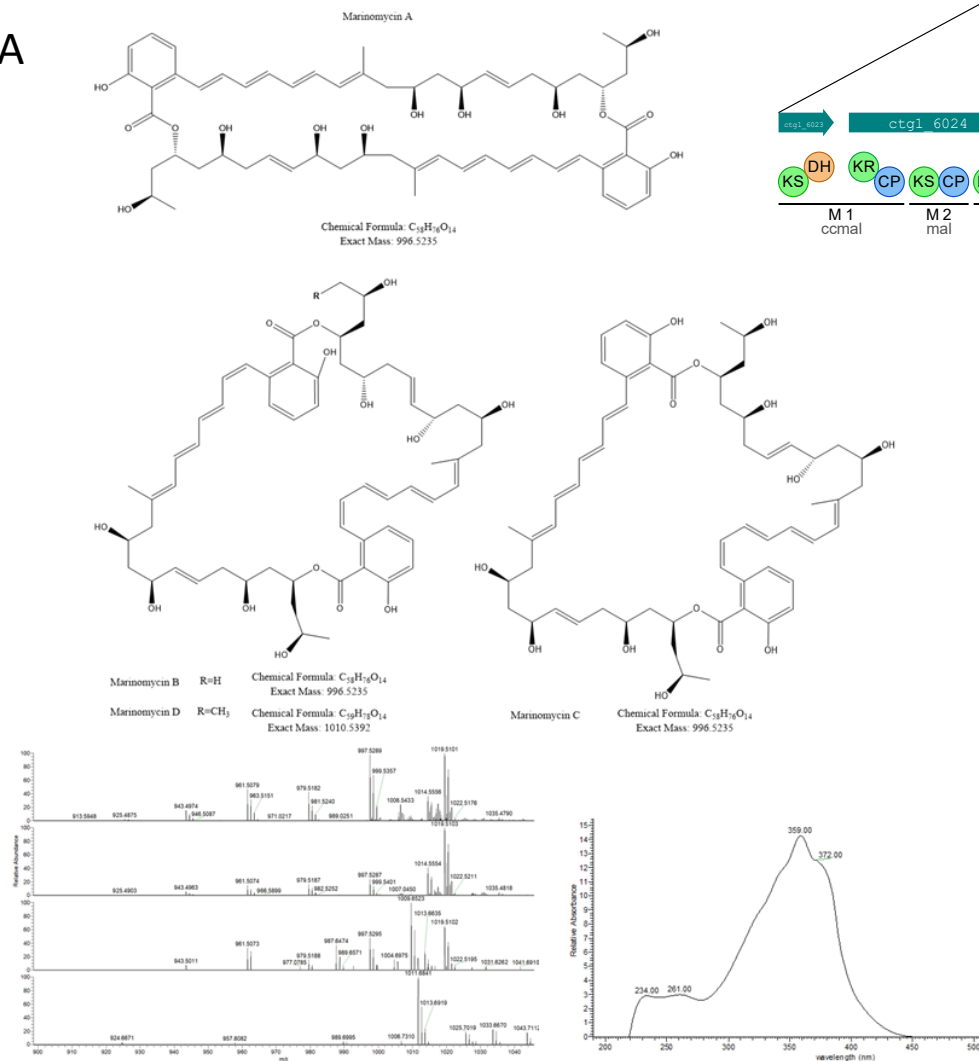B **Marinomycin**

- ◀ resistance
- ▶ PKS
- ◀ transport
- ▶ regulation
- ◀ other

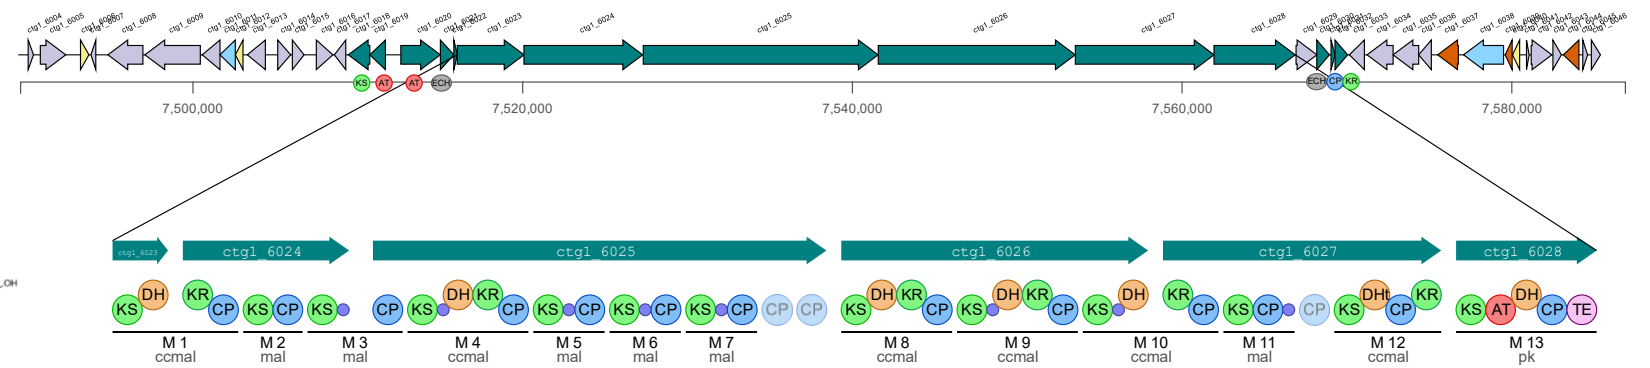

Figure S5. A) Identification of marinomycins: top, structures of identified congeners; bottom, HR full masses in positive ionization mode (left) and UV spectrum (right). Stereochemistry is assumed to be as reported in Natural Product Atlas (<https://www.npatlas.org/>). B) Predicted marinomycins BGC. Red arrows indicate genes that are a part of HMGS cassette. The enlargement shows the PKS domains. All genes are listed in Supplementary Table S4 (page S23).

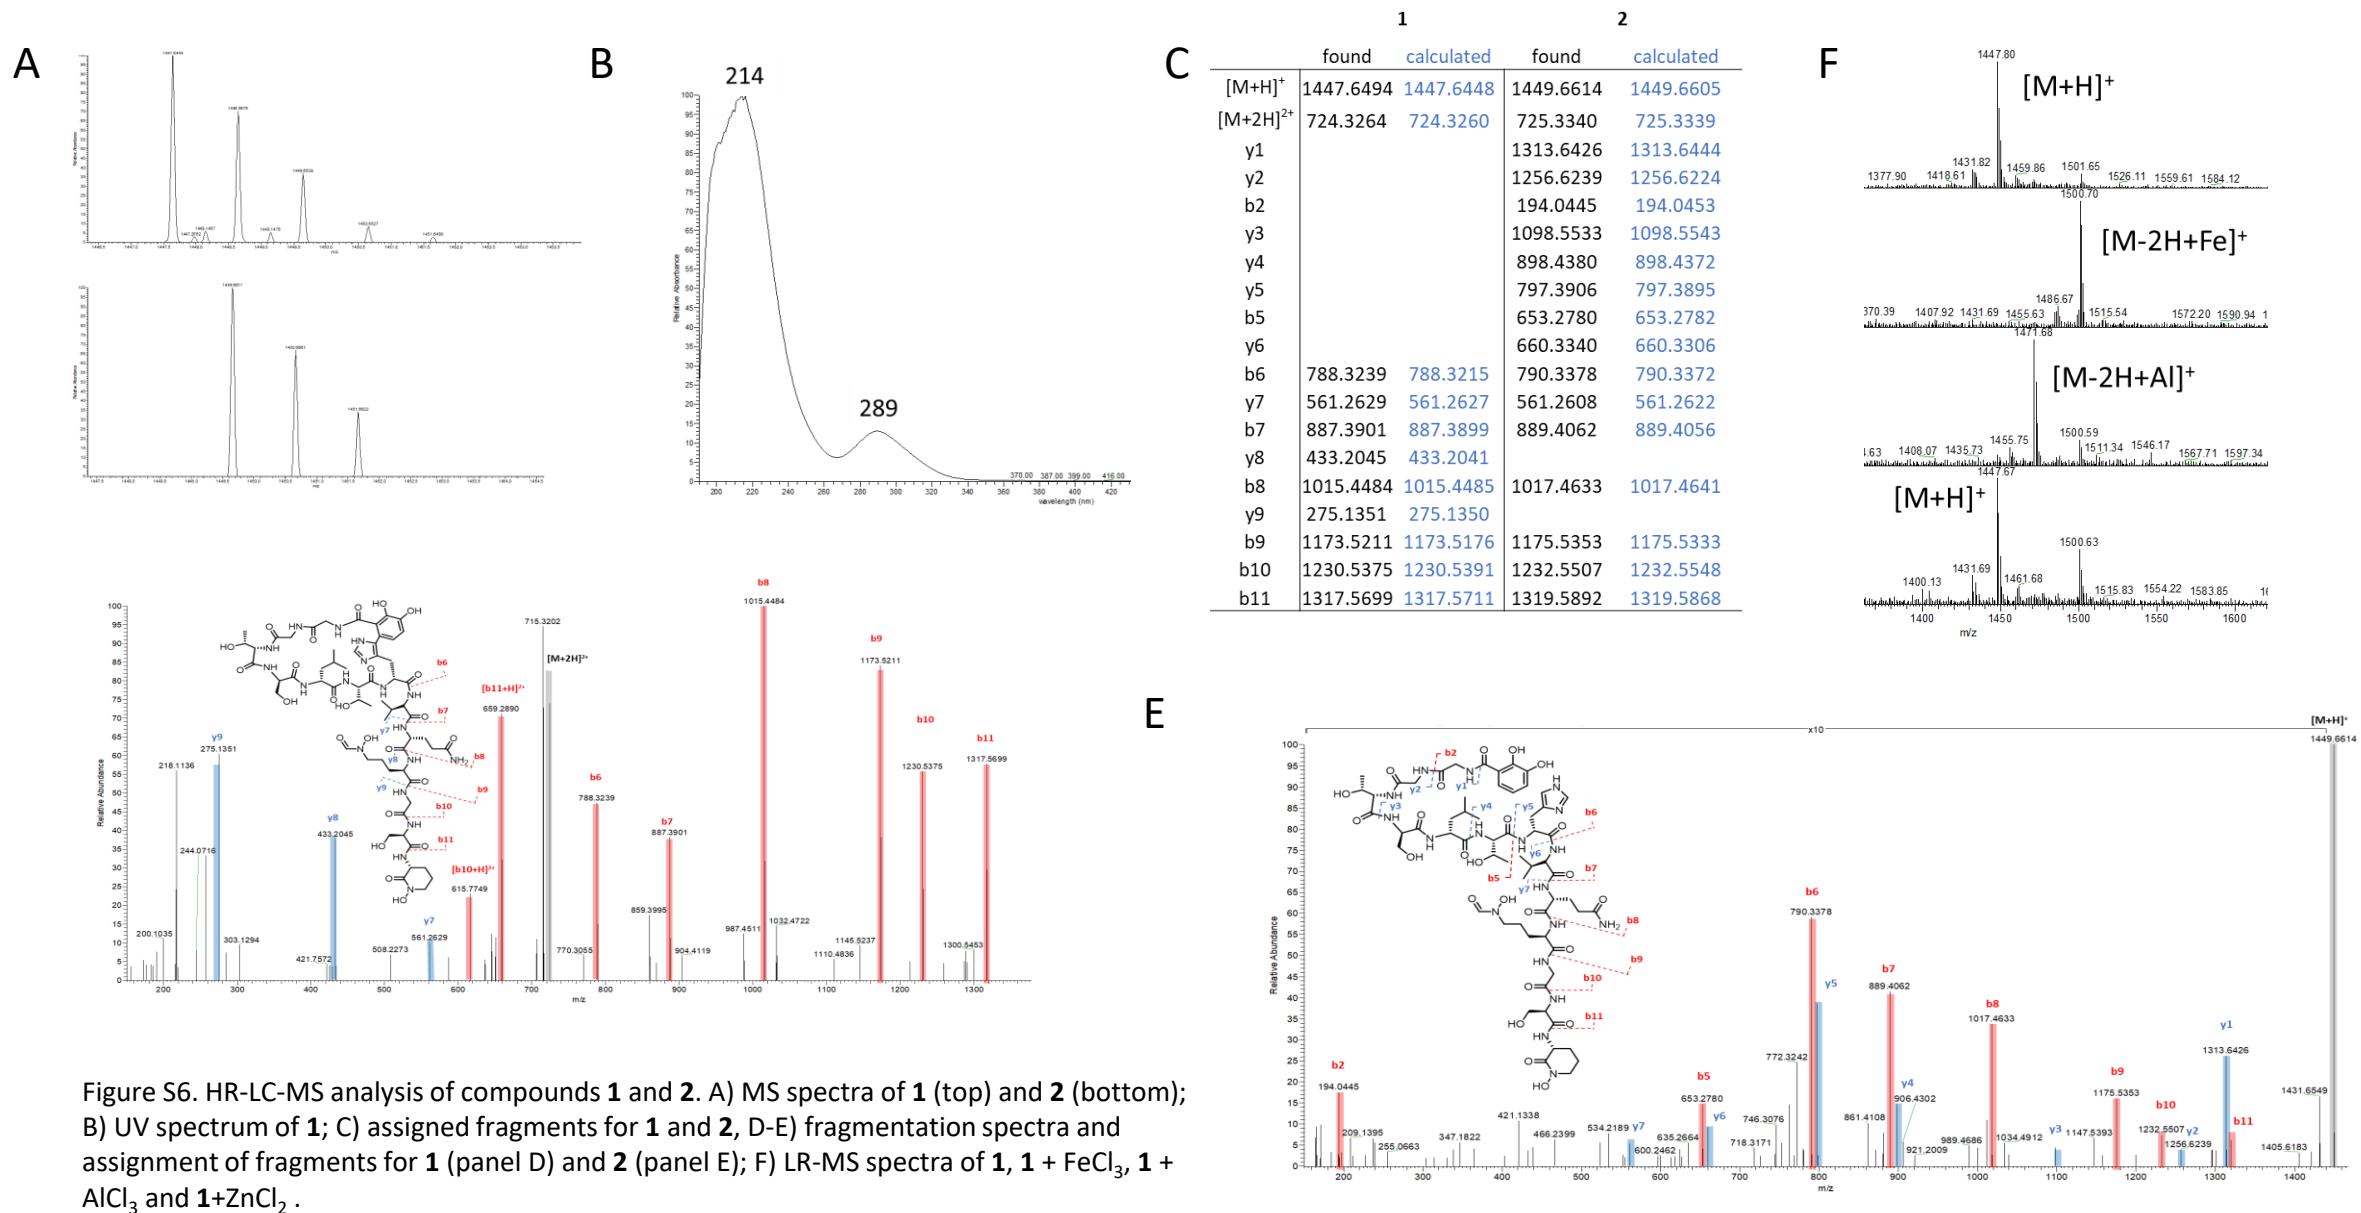

Figure S6. HR-LC-MS analysis of compounds **1** and **2**. A) MS spectra of **1** (top) and **2** (bottom); B) UV spectrum of **1**; C) assigned fragments for **1** and **2**, D-E) fragmentation spectra and assignment of fragments for **1** (panel D) and **2** (panel E); F) LR-MS spectra of **1**, **1** + FeCl<sub>3</sub>, **1** + AlCl<sub>3</sub> and **1**+ZnCl<sub>2</sub>.

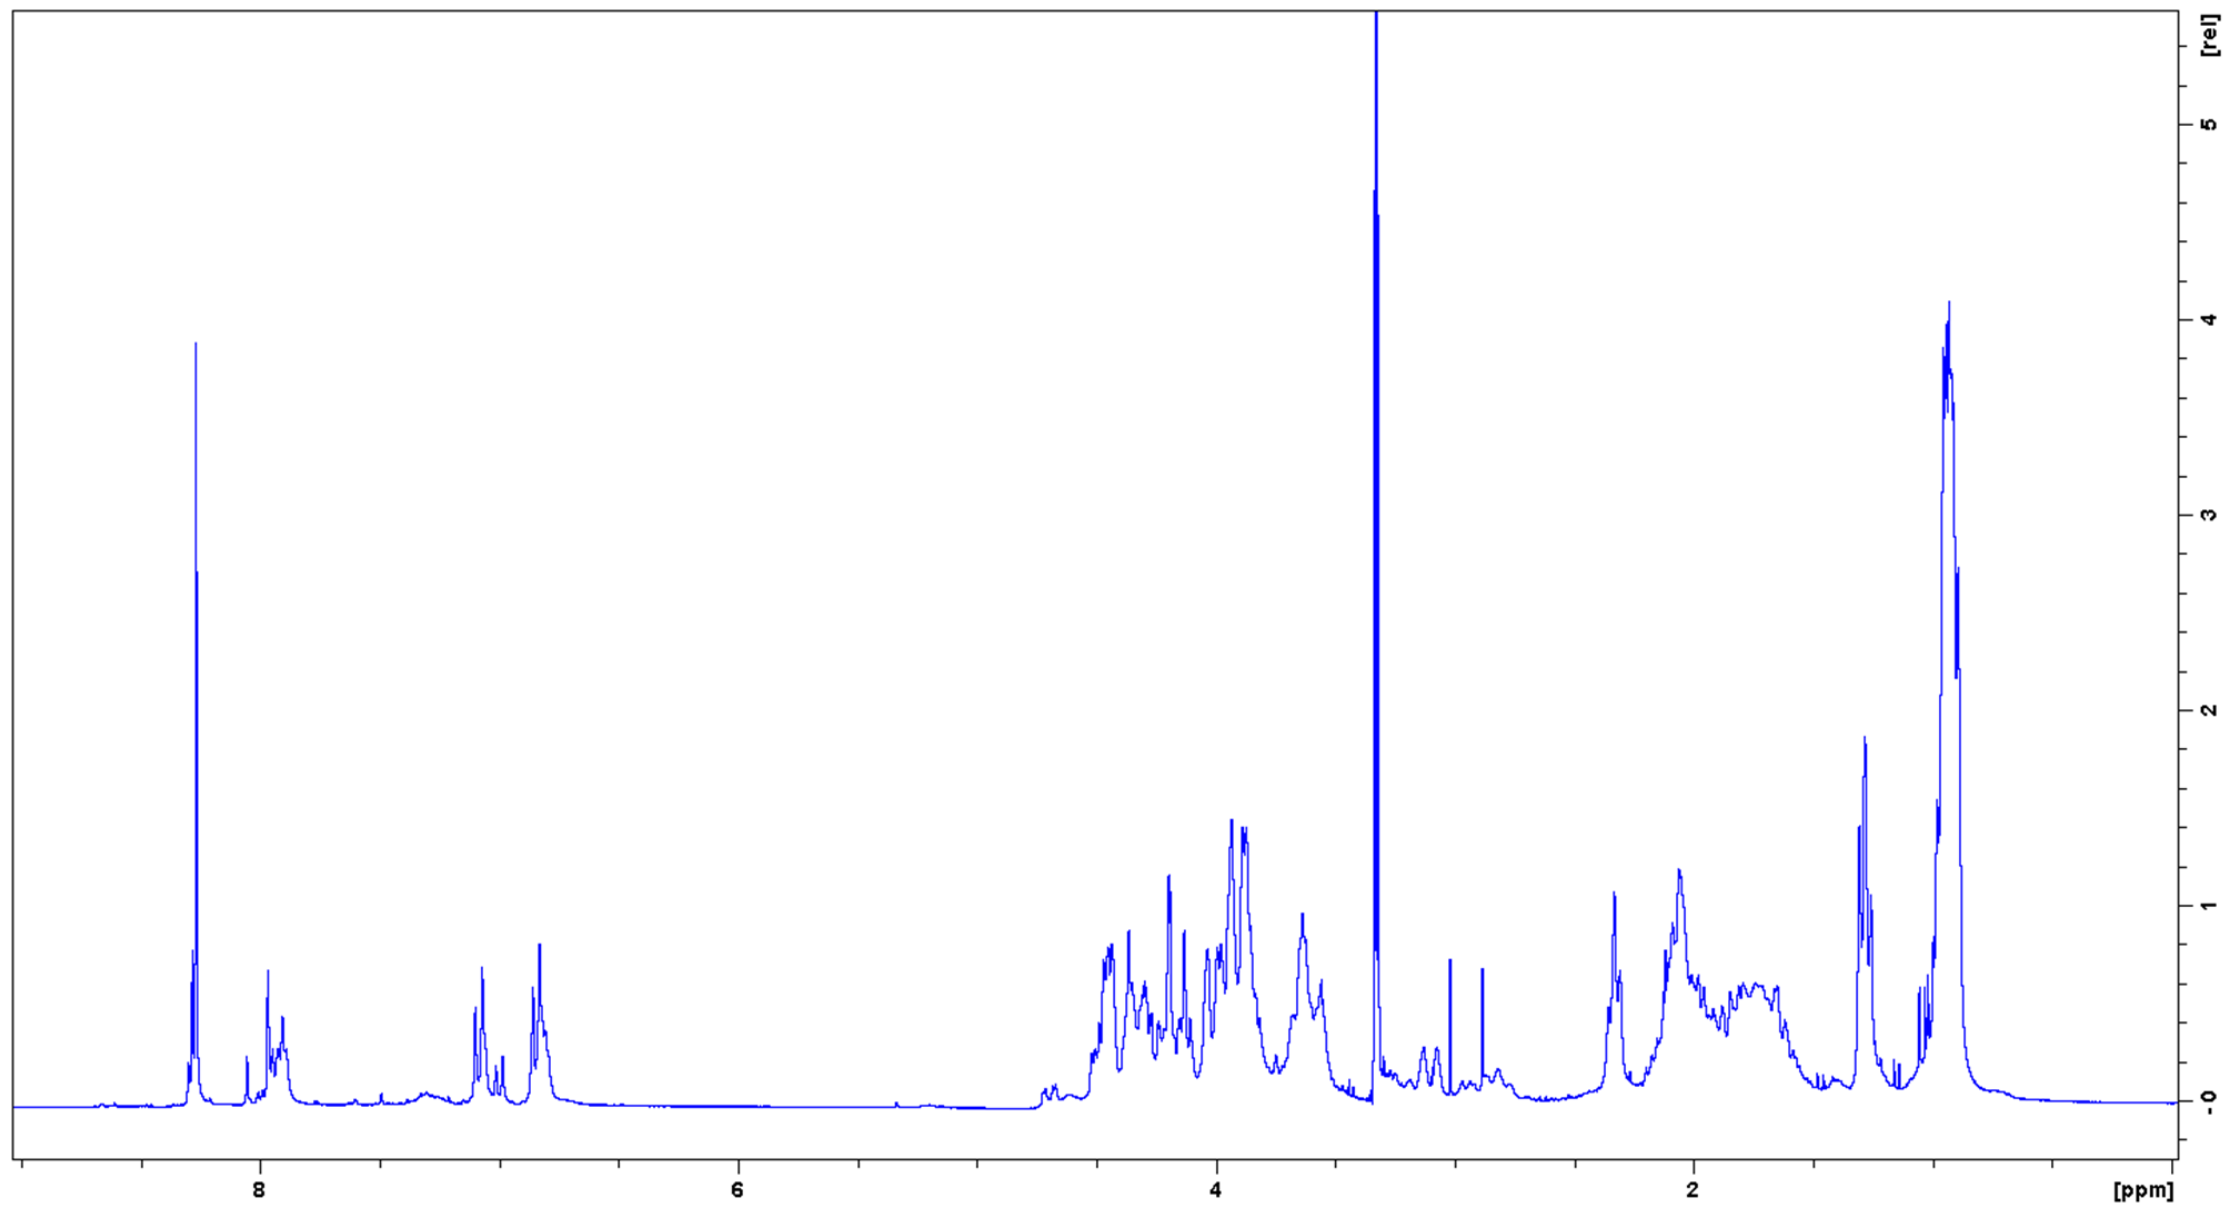

Figure S7.  $^1\text{H}$  NMR (300 MHz,  $\text{CD}_3\text{OD}:\text{H}_2\text{O}$  9.8:0.2) of **1**.



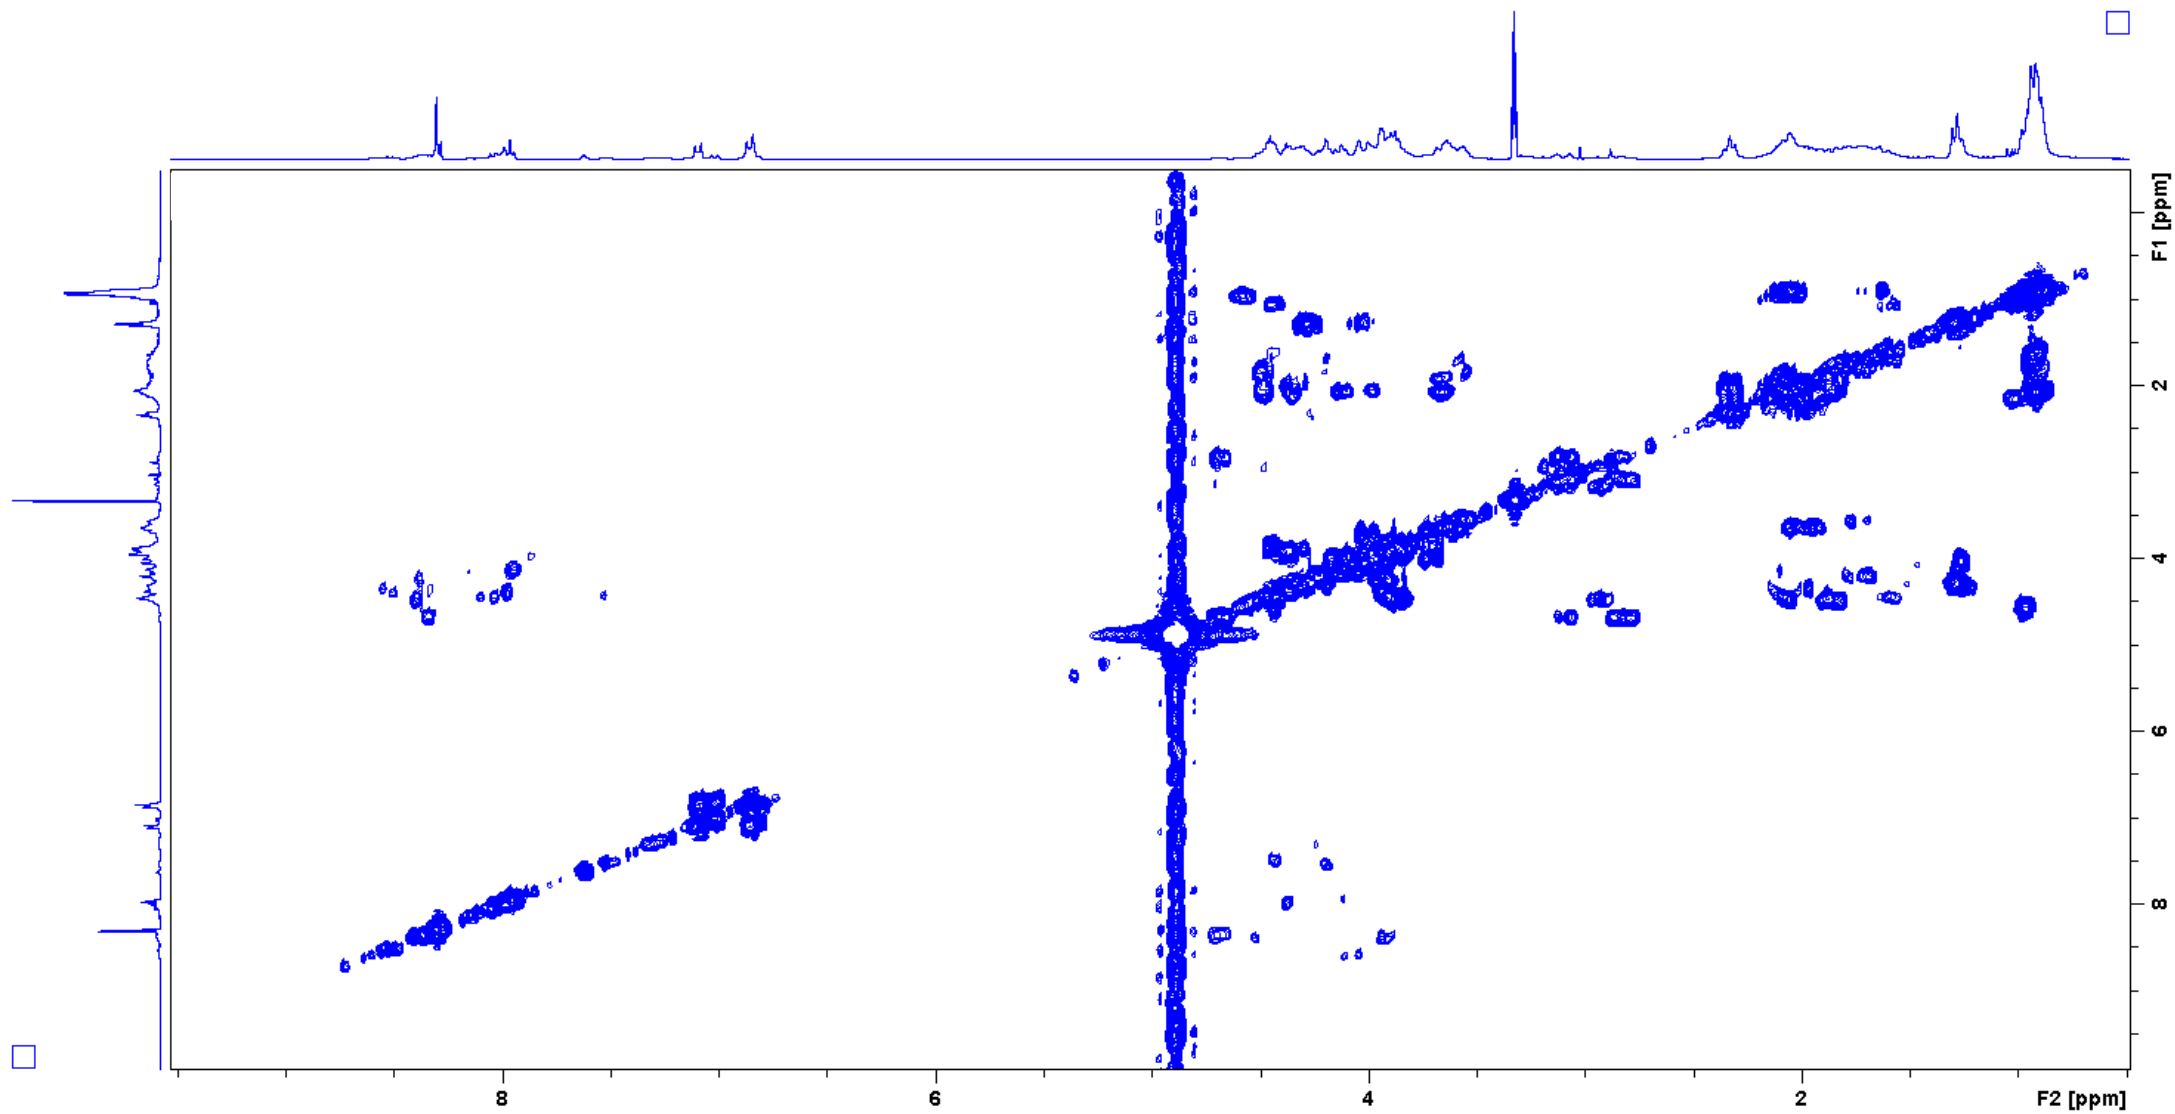

Figure S8. <sup>1</sup>H-COSY NMR (300 MHz, CD<sub>3</sub>OD:H<sub>2</sub>O 9.8:0.2) of **1**.

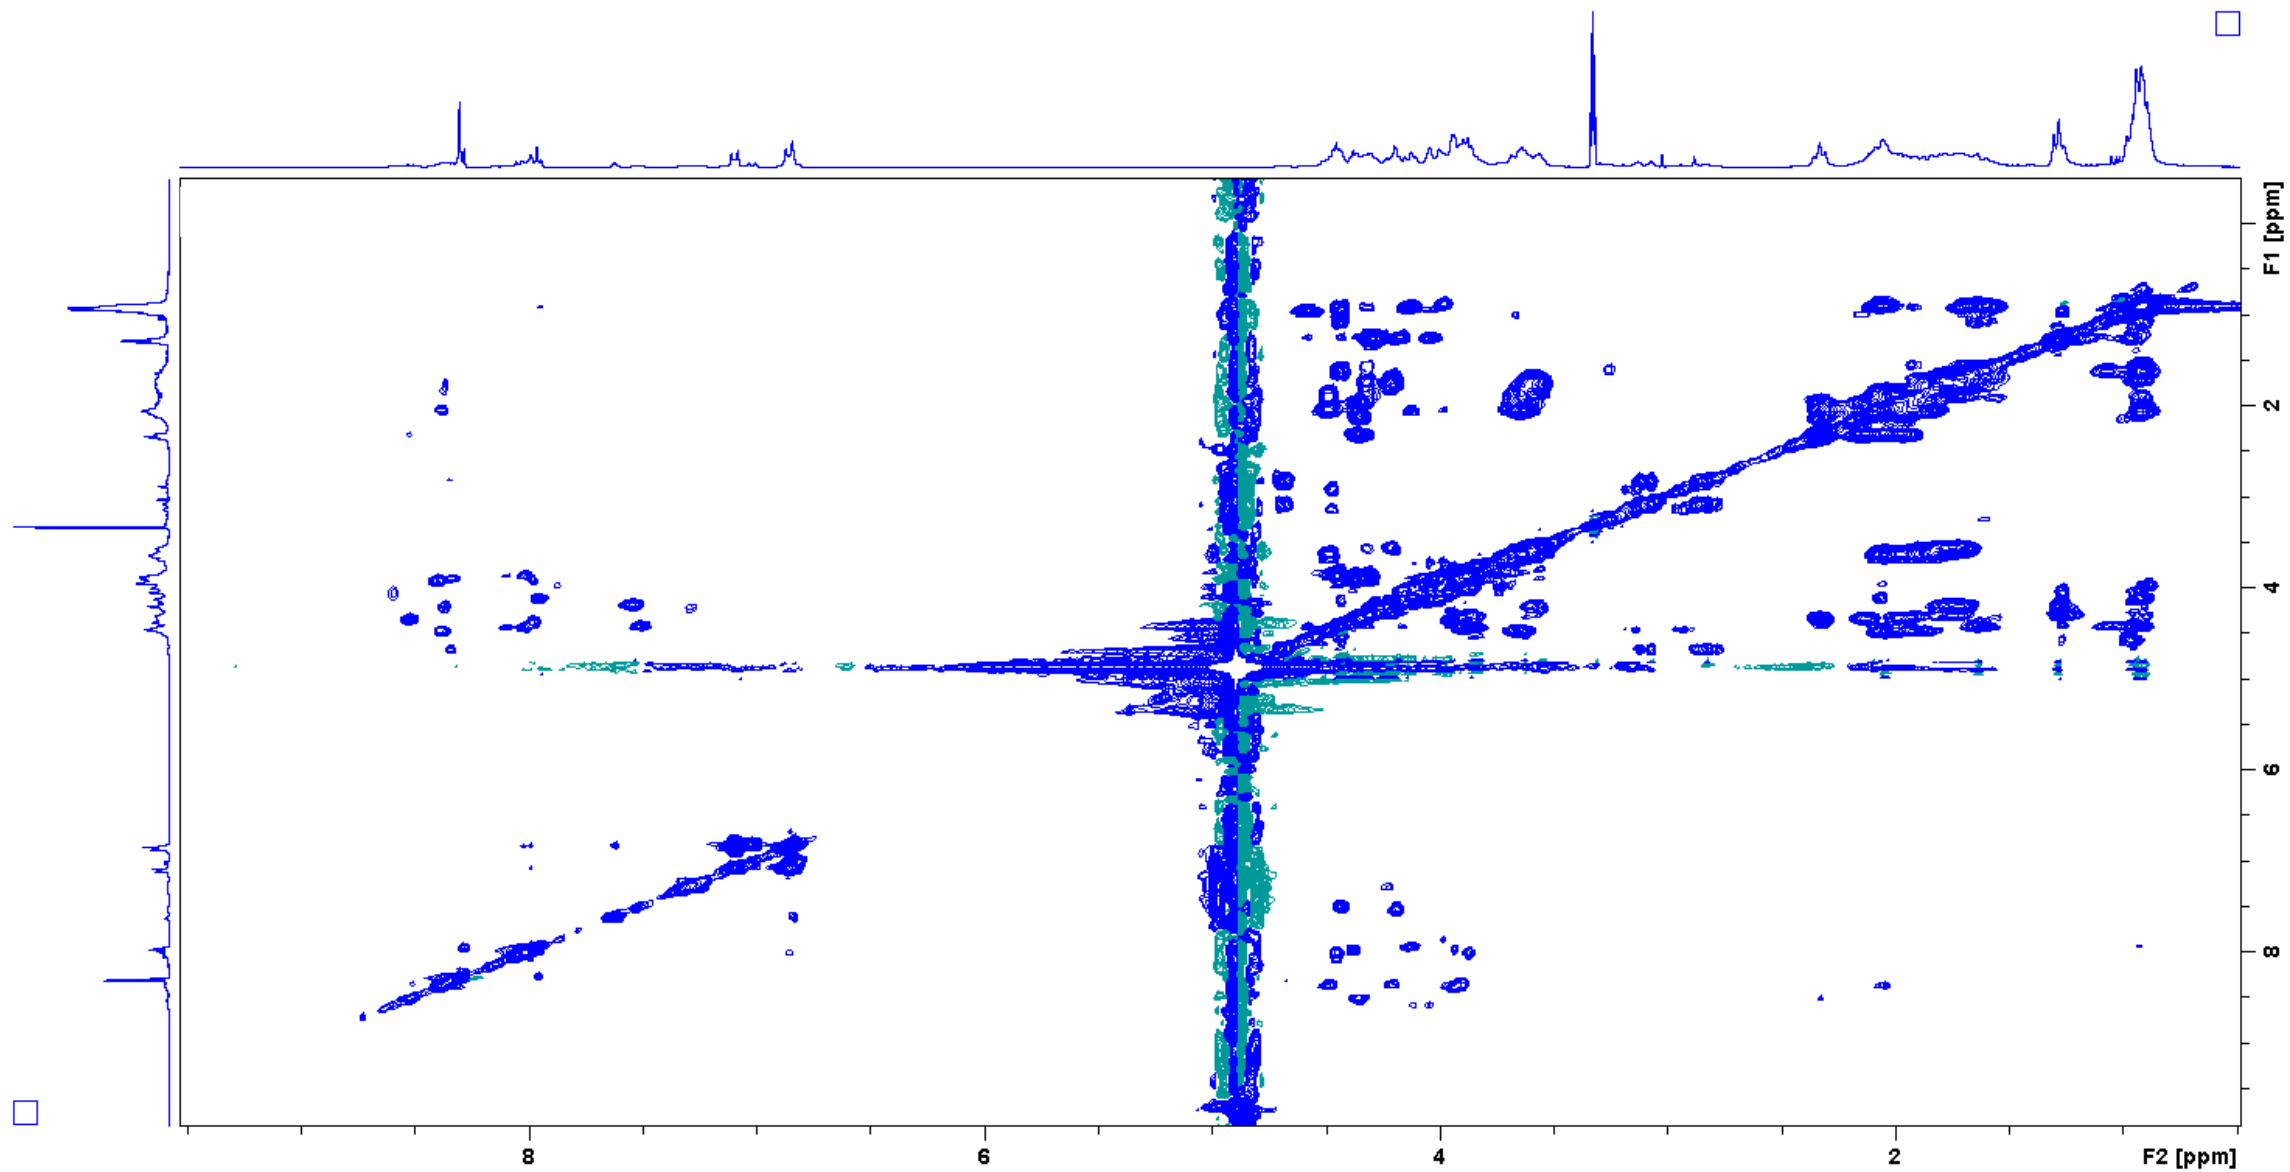

Figure S9.  $^1\text{H}$ -TOCSY NMR (300 MHz,  $\text{CD}_3\text{OD}:\text{H}_2\text{O}$  9.8:0.2) of **1**.

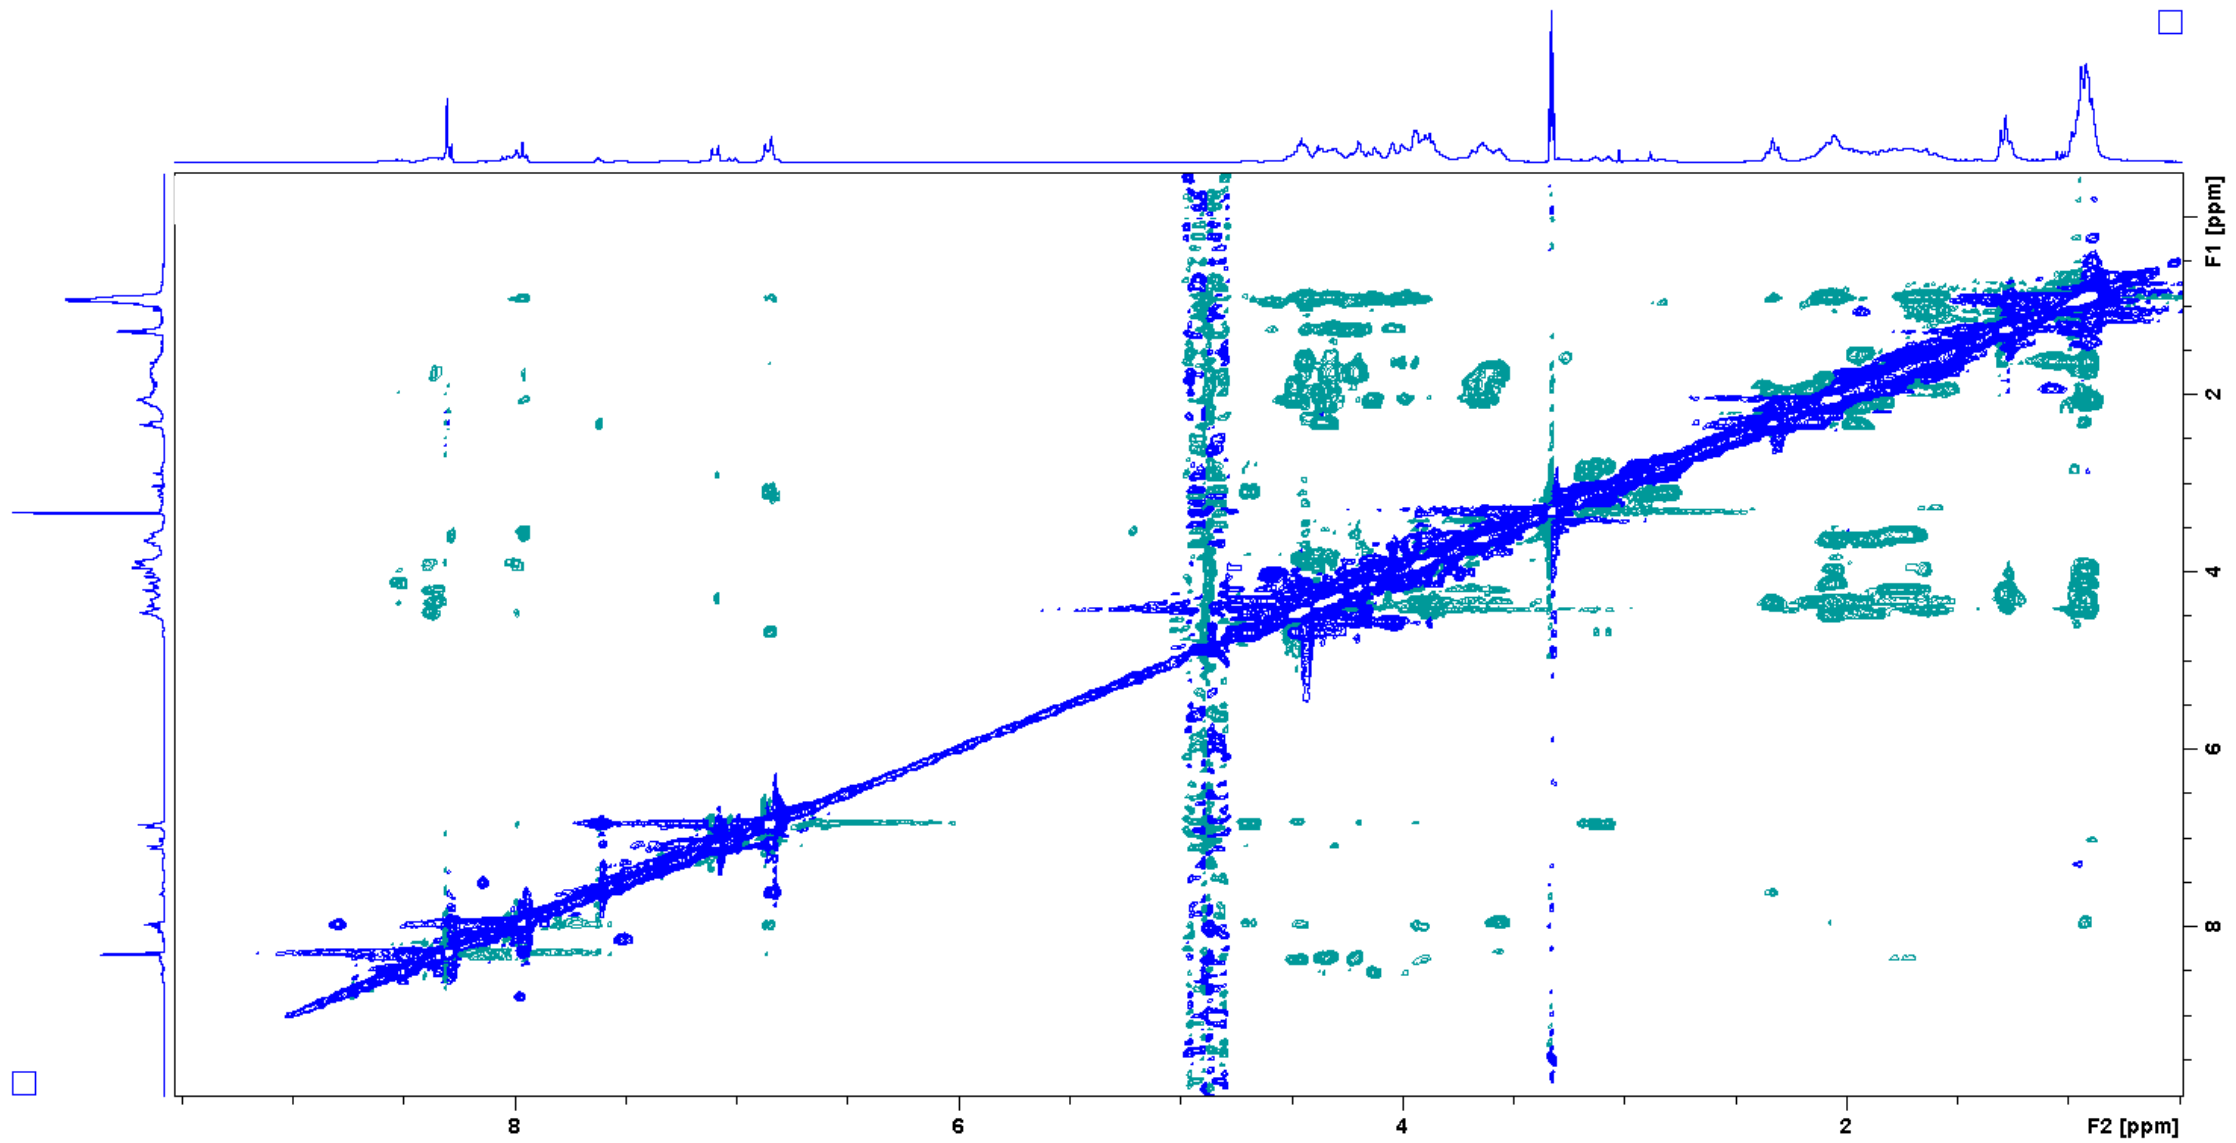

Figure S10.  $^1\text{H}$ -ROESY NMR (300 MHz,  $\text{CD}_3\text{OD}:\text{H}_2\text{O}$  9.8:0.2) of **1**.

A

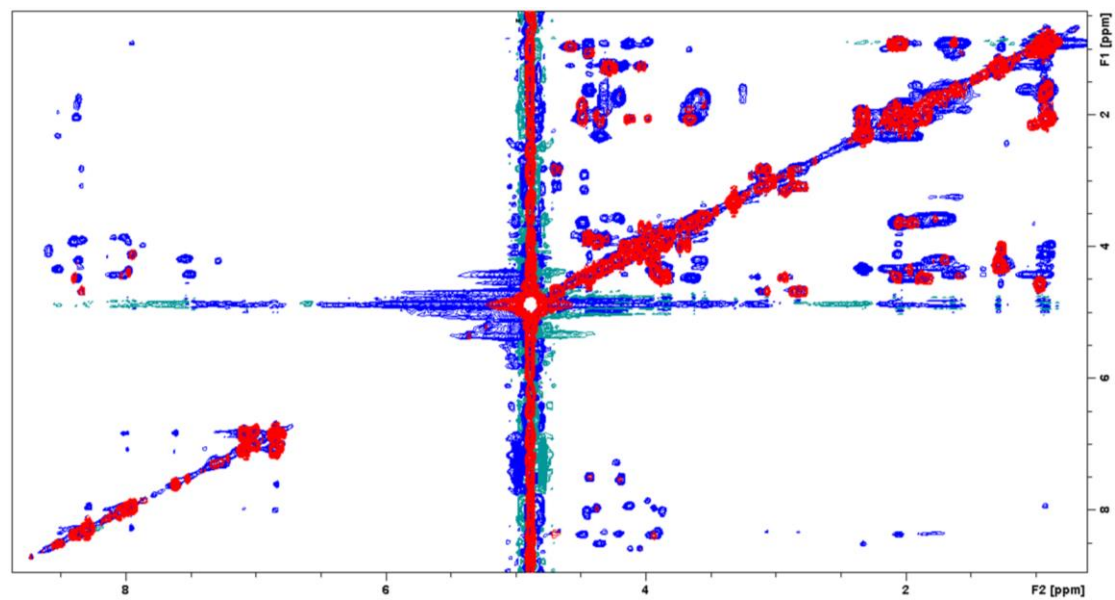

B

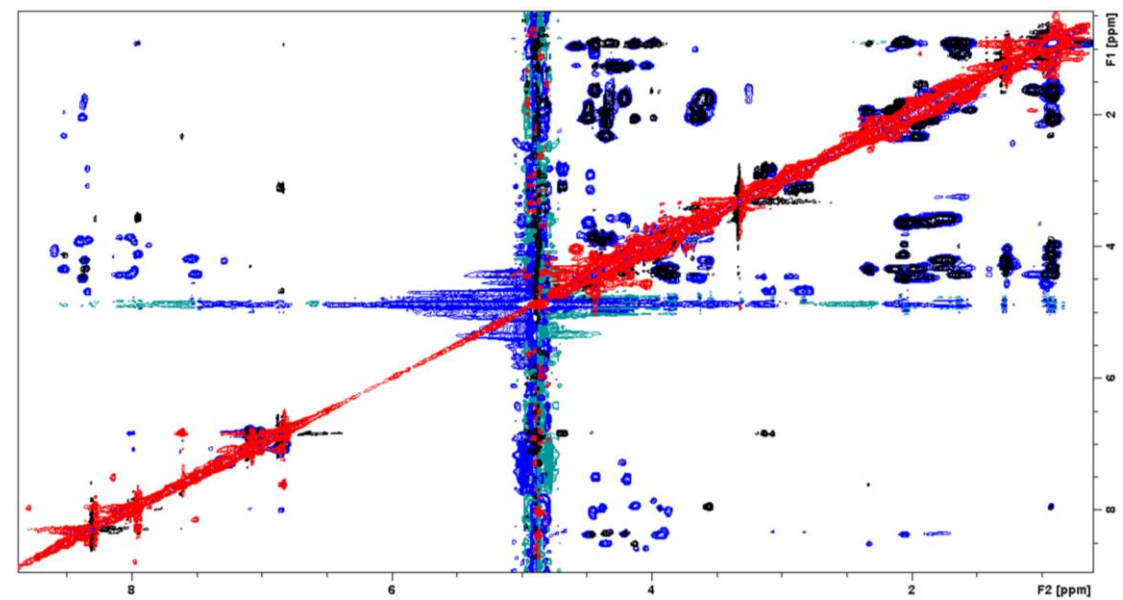

C

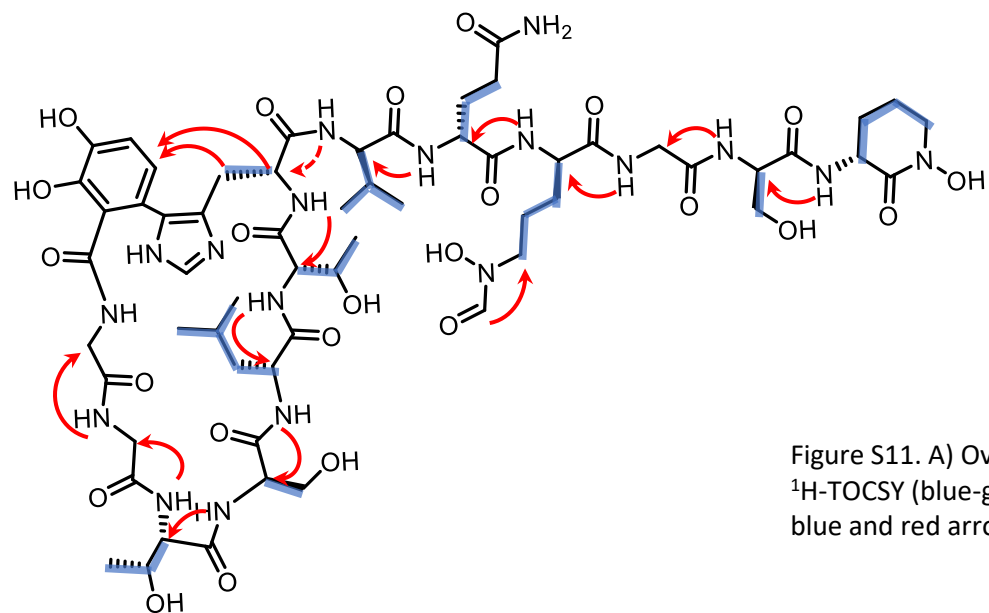

Figure S11. A) Overlap of  $^1\text{H}$ -COSY (red) and  $^1\text{H}$ -TOCSY (blue-green) NMR and B) overlap of  $^1\text{H}$ -ROESY (red-black) and  $^1\text{H}$ -TOCSY (blue-green) (300 MHz,  $\text{CD}_3\text{OD}:\text{H}_2\text{O}$  9.8:0.2) of **1**. C) Structure of **1** with COSY correlations highlighted in blue and red arrows showing main ROESY correlations.

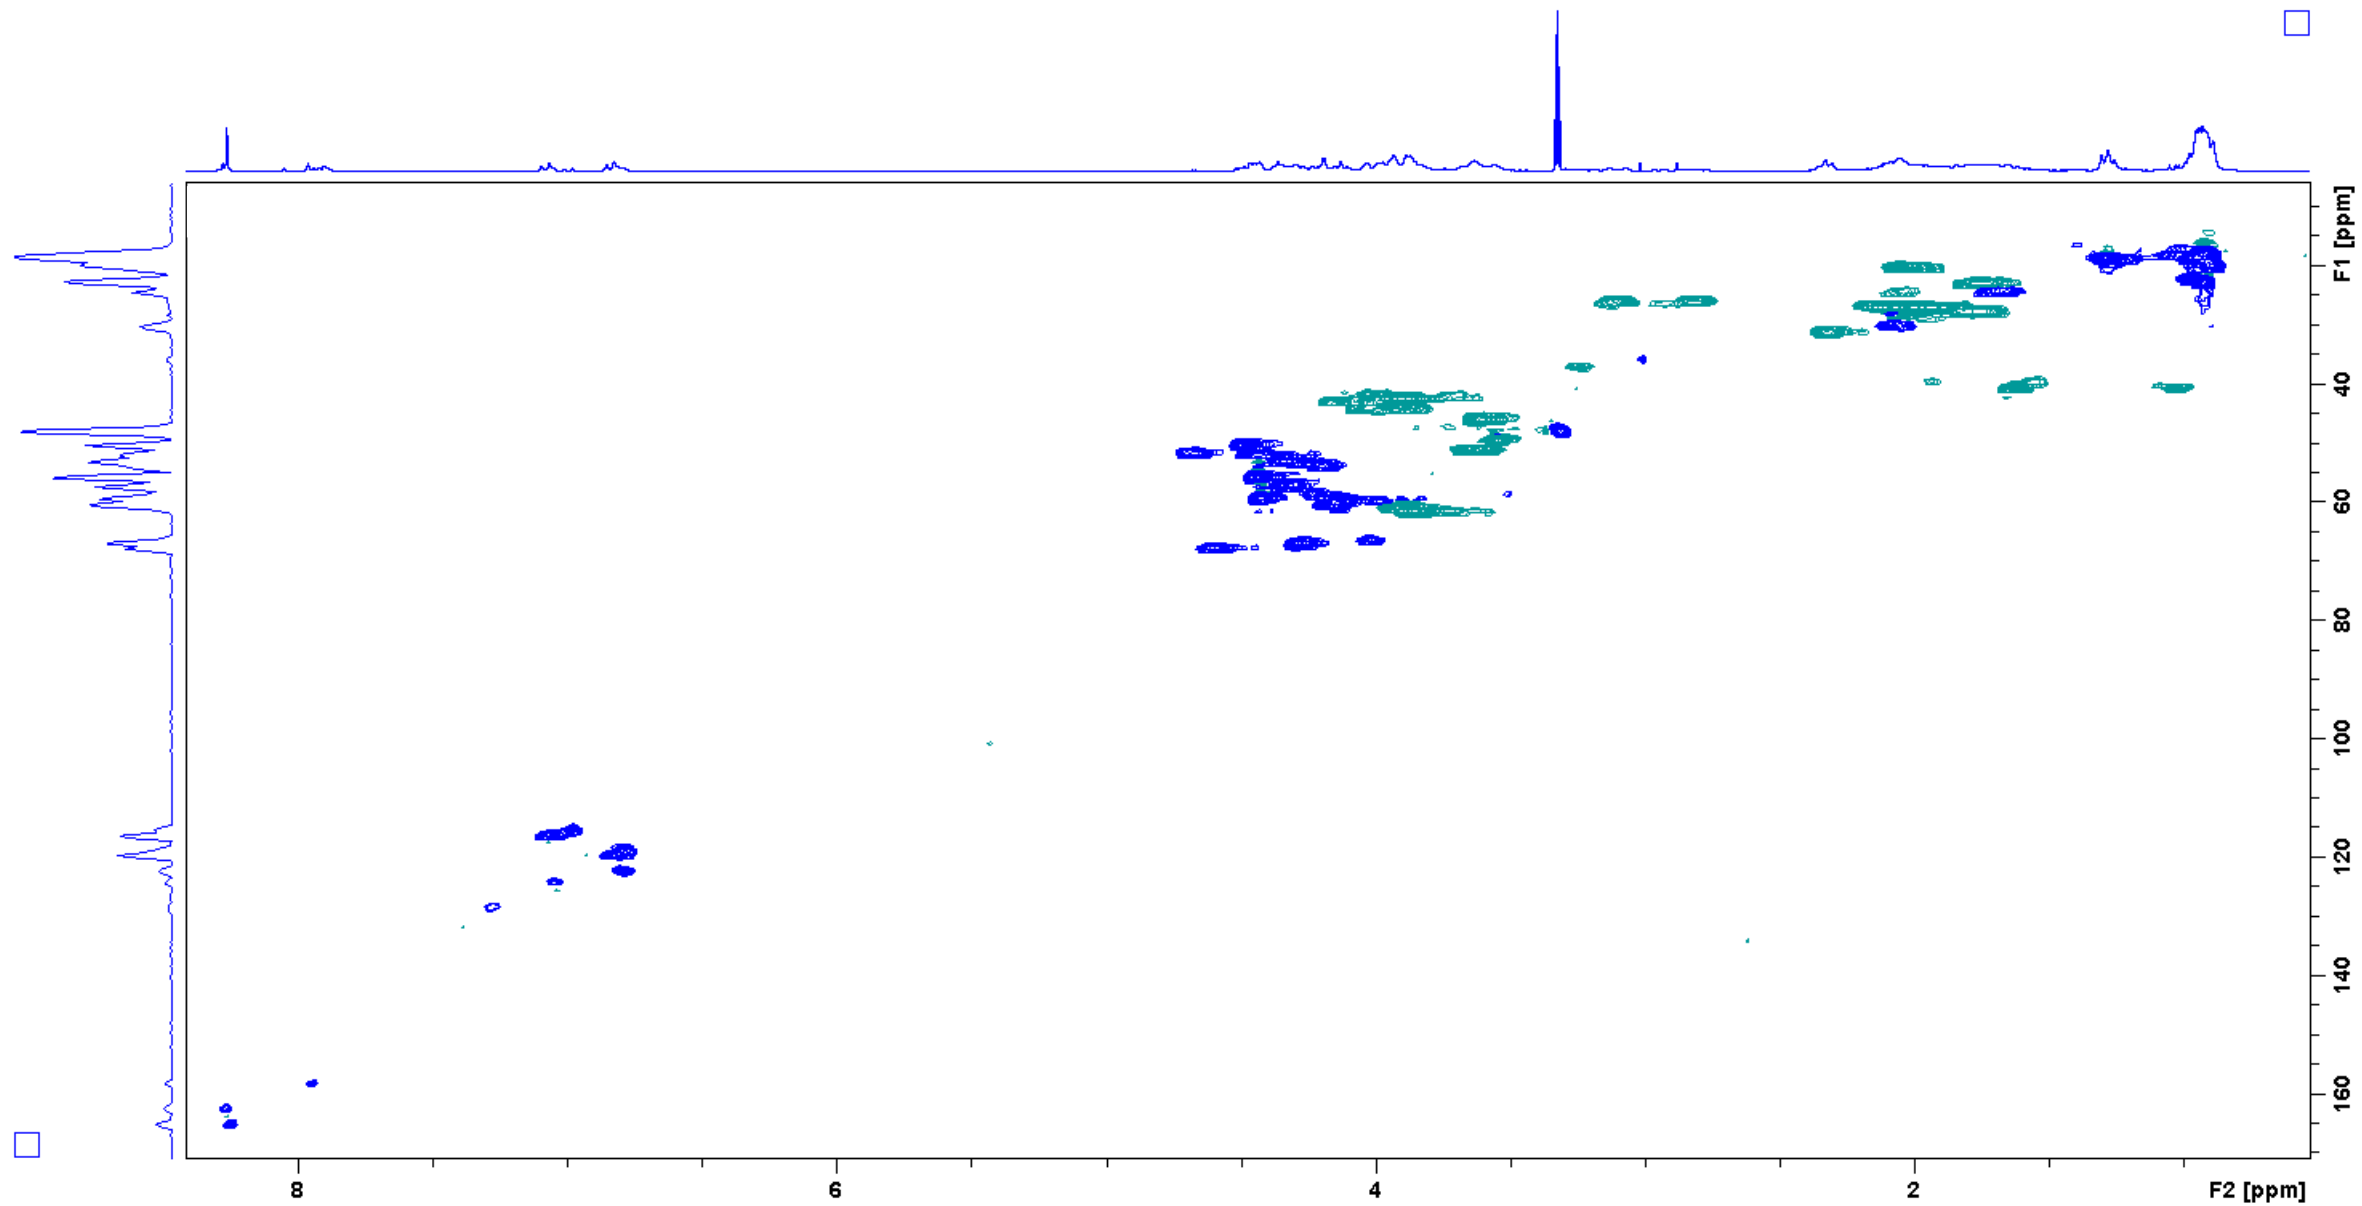

Figure S12. A)  $^1\text{H}$ - $^{13}\text{C}$  HSQC NMR (300 MHz,  $\text{CD}_3\text{OD}:\text{H}_2\text{O}$  9.8:0.2) of **1**.

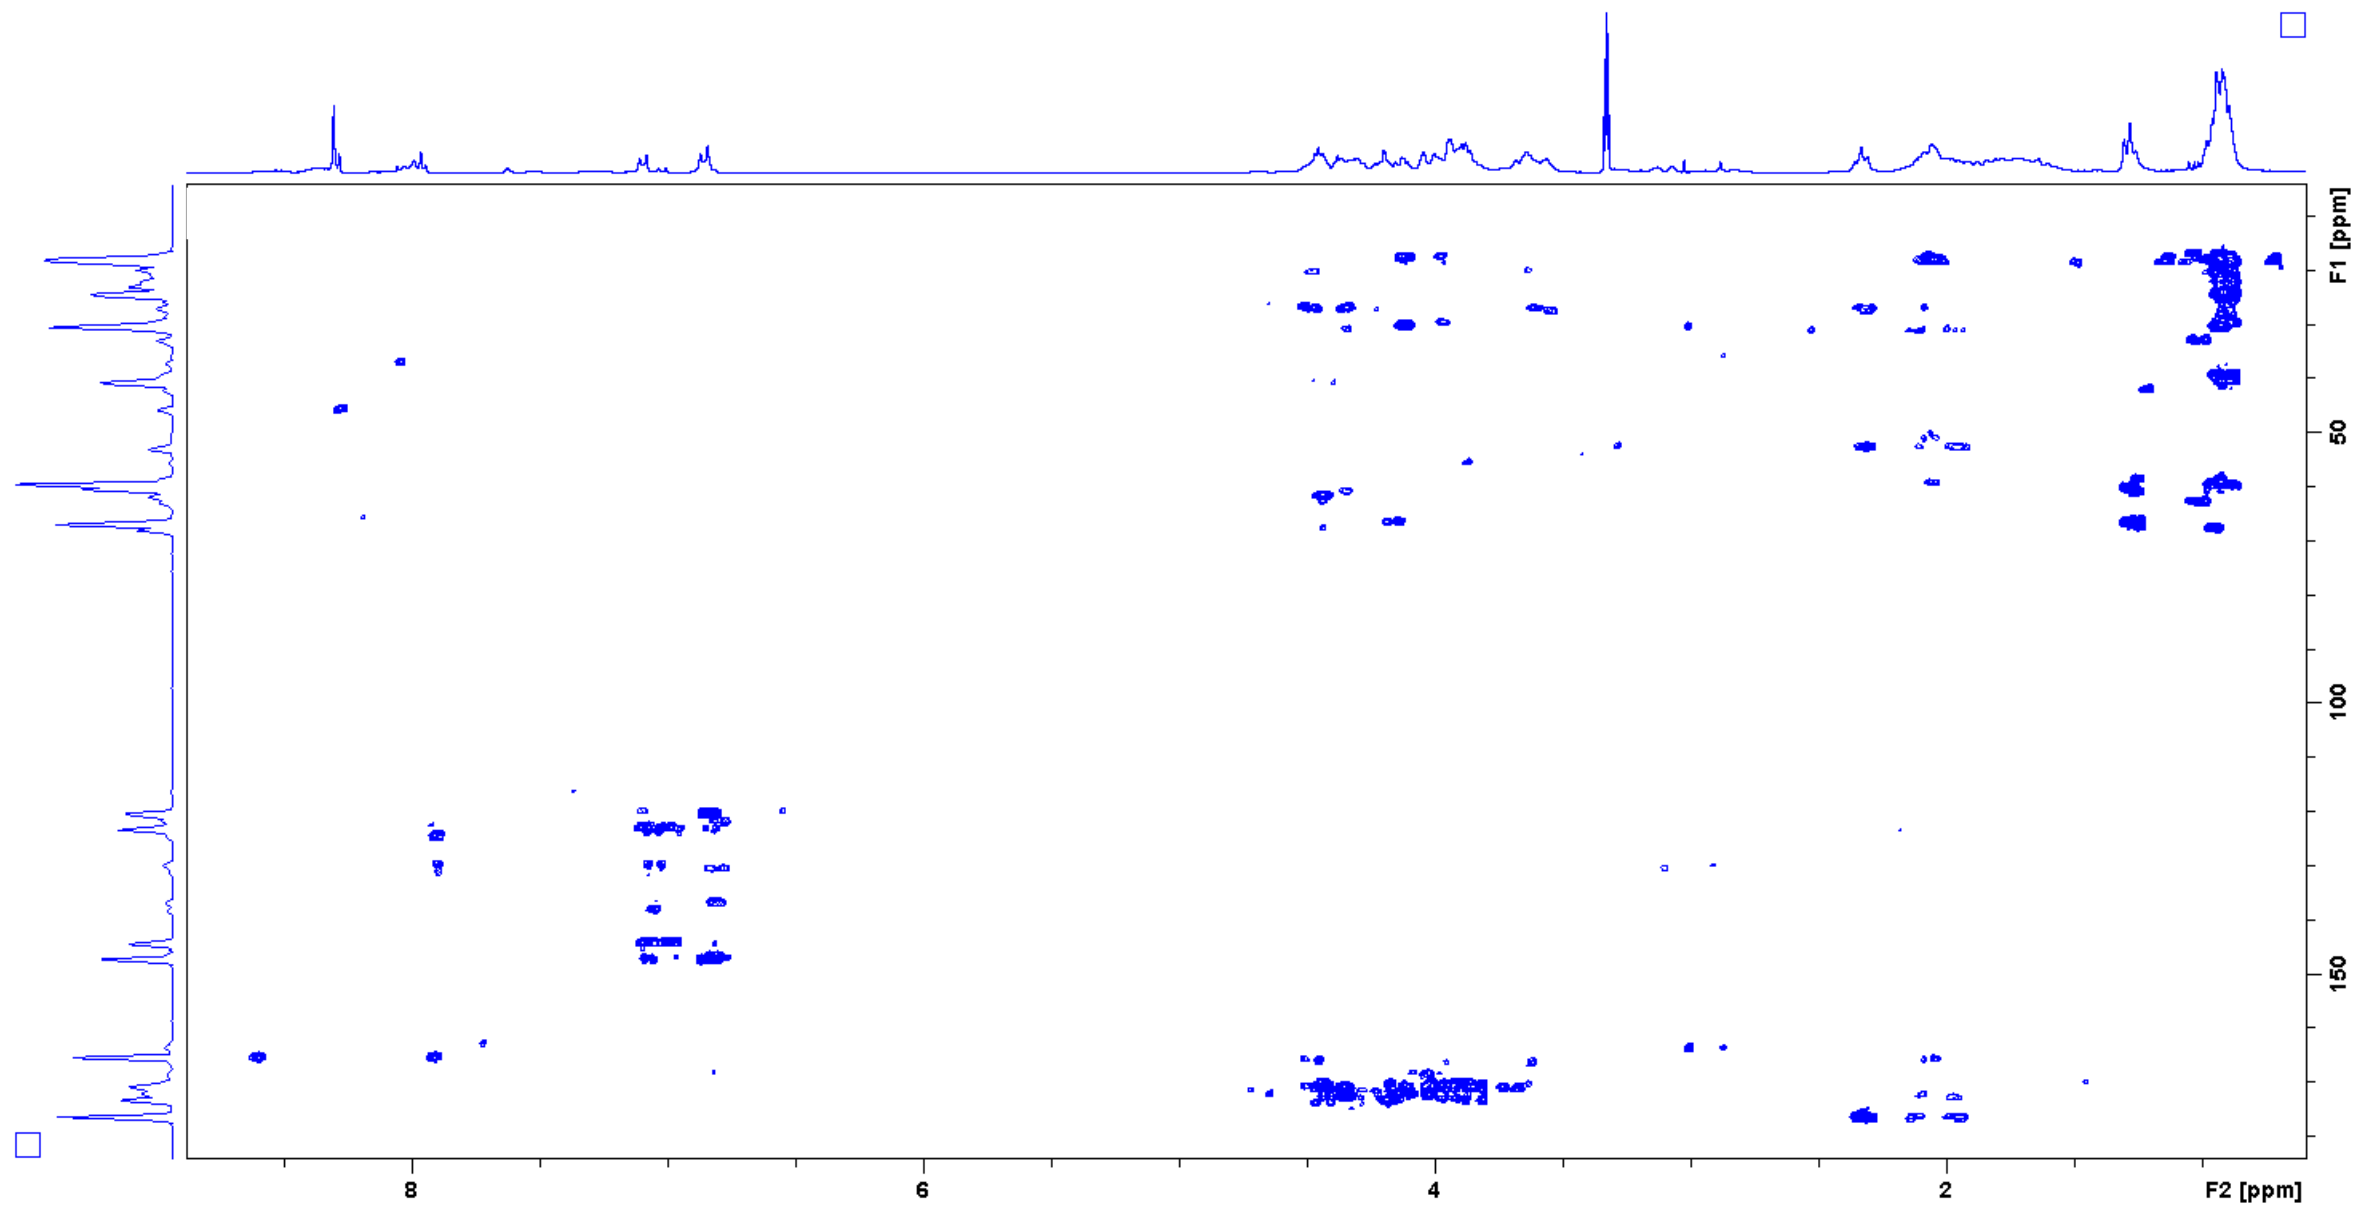

Figure S13. A)  $^1\text{H}$ - $^{13}\text{C}$  HMBC NMR (300 MHz,  $\text{CD}_3\text{OD}:\text{H}_2\text{O}$  9.8:0.2) of **1**.

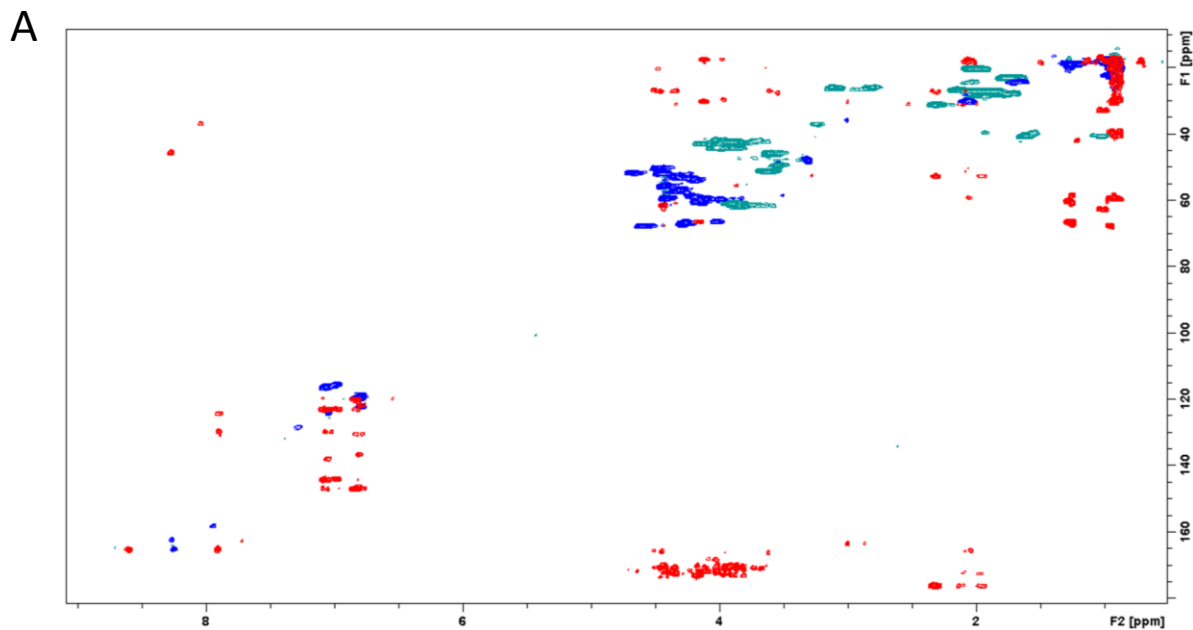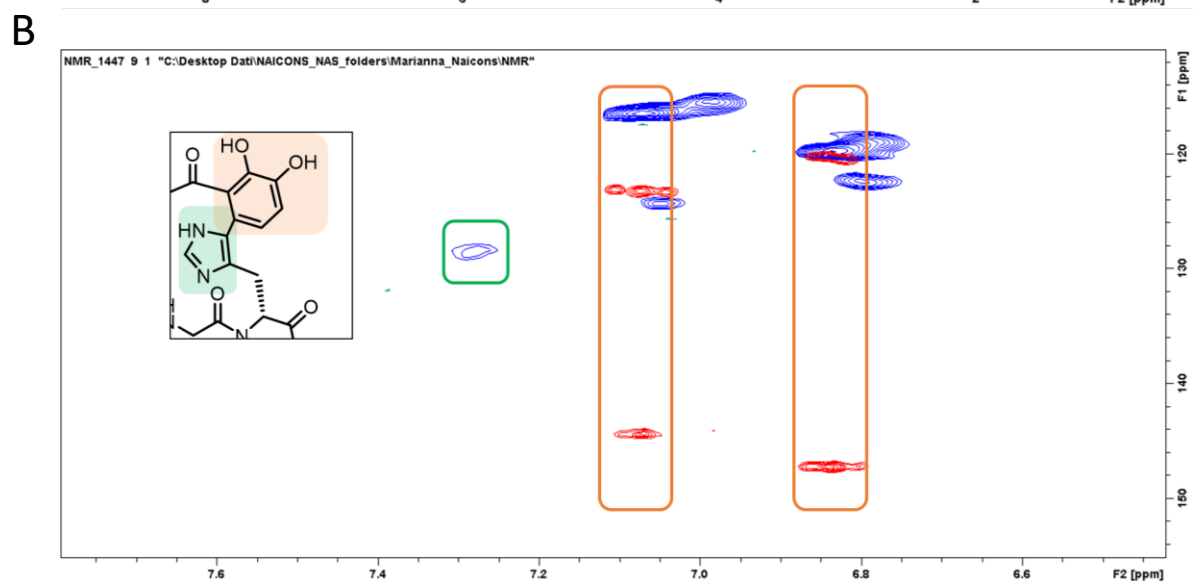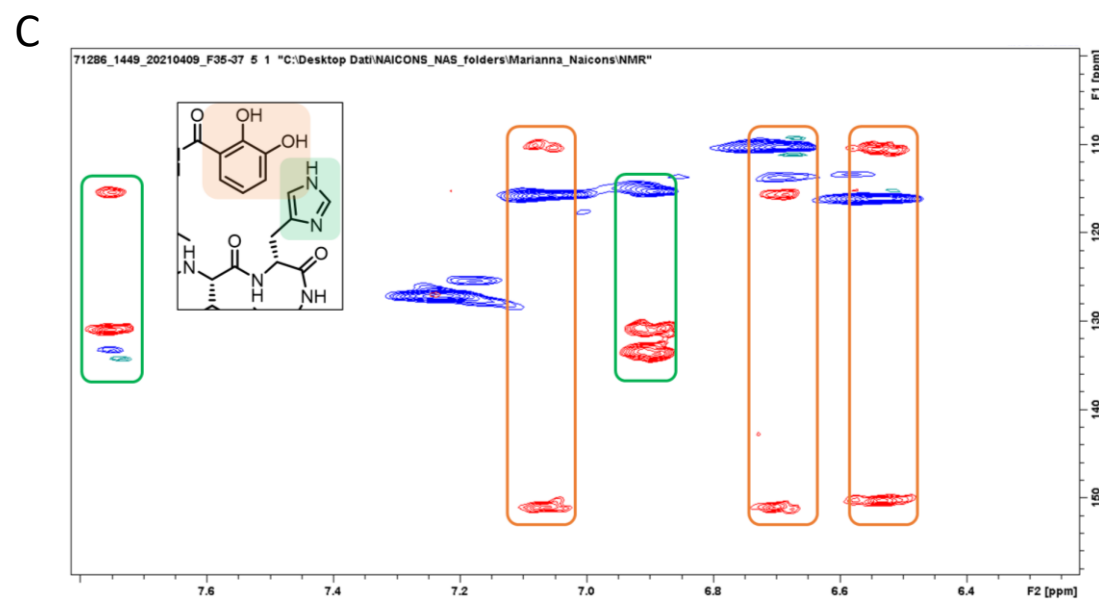

Figure S14. A) Overlap of  $^1\text{H}$ - $^{13}\text{C}$  HSQC (blue/green) and  $^1\text{H}$ - $^{13}\text{C}$  HMBC (red) (300 MHz,  $\text{CD}_3\text{OD}:\text{H}_2\text{O}$  9.8:0.2) of **1**. B-C) selected HSQC-HMBC region of **1** (B) and **2** (C) (see manuscript for details).

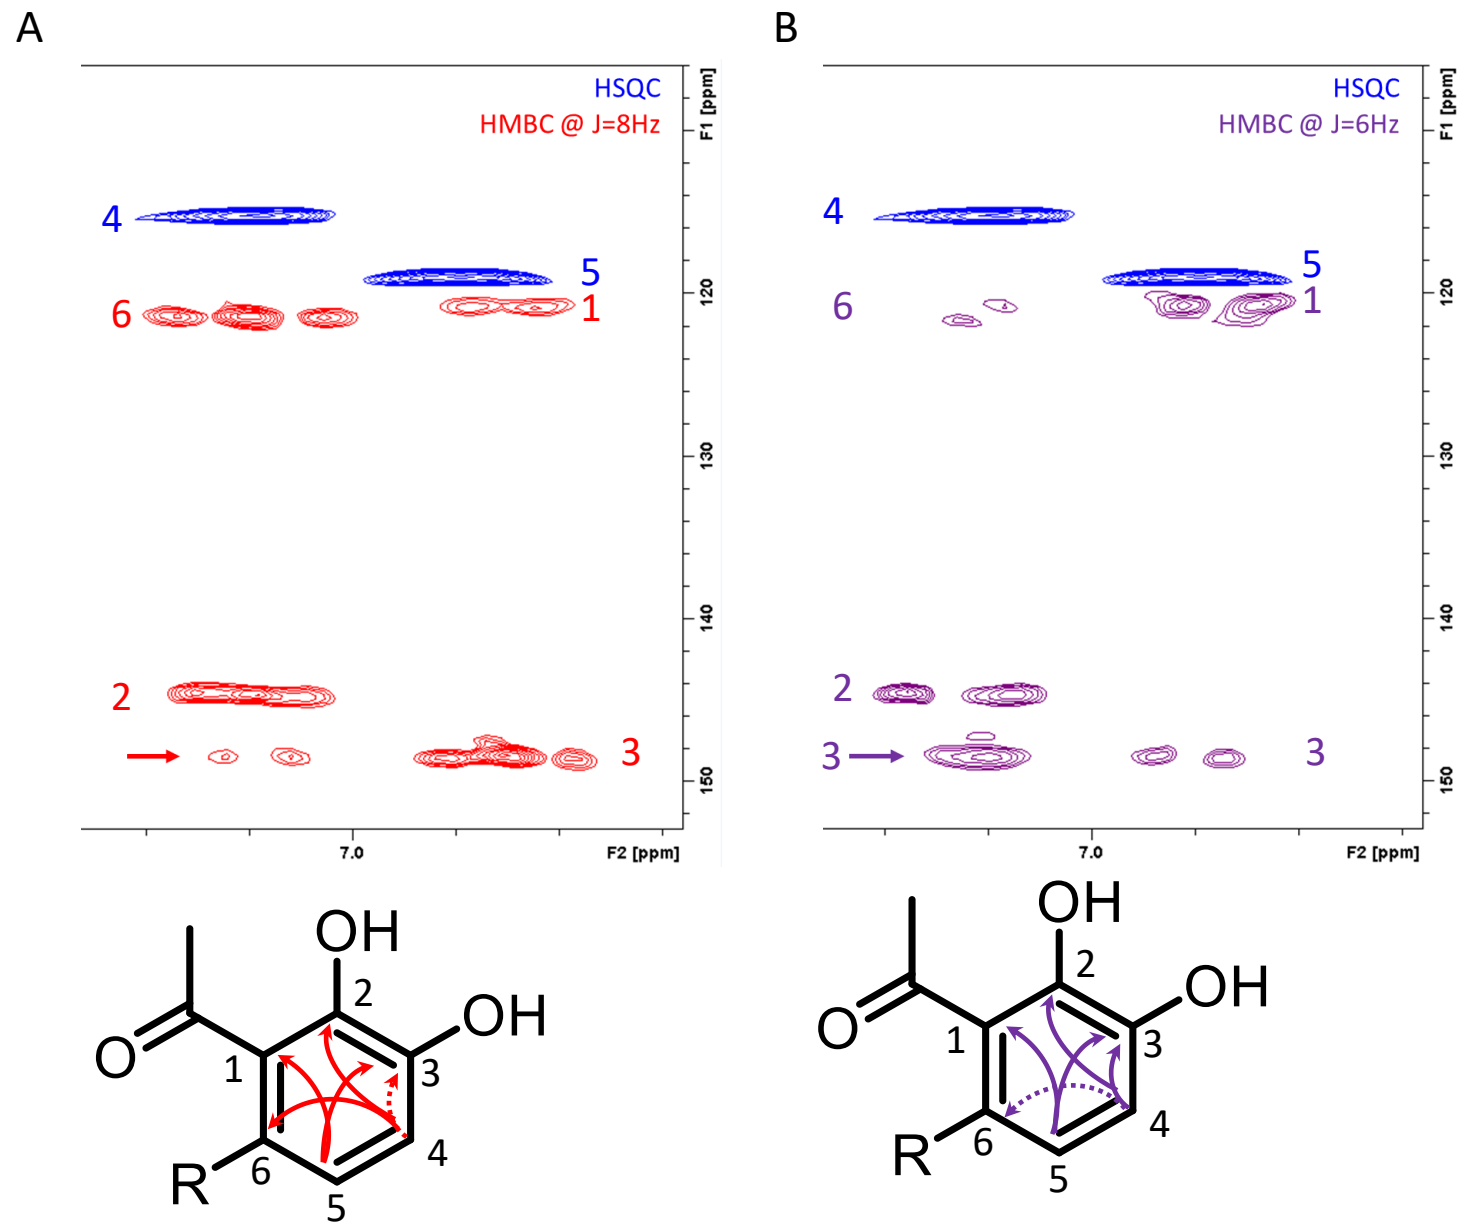

Figure S15. A) Selected region reporting an overlap of  $^1\text{H}$ - $^{13}\text{C}$  HSQC (blue) and  $^1\text{H}$ - $^{13}\text{C}$  HMBC optimised for JCH long-range couplings of 8 Hz (red) (300 MHz,  $\text{DMSO}_{d6}$ ), B) selected region reporting an overlap of  $^1\text{H}$ - $^{13}\text{C}$  HSQC (blue) and  $^1\text{H}$ - $^{13}\text{C}$  HMBC optimised for JCH long- and short-range couplings of 6 Hz (purple) (300 MHz,  $\text{DMSO}_{d6}$ ), and the corresponding assignments.



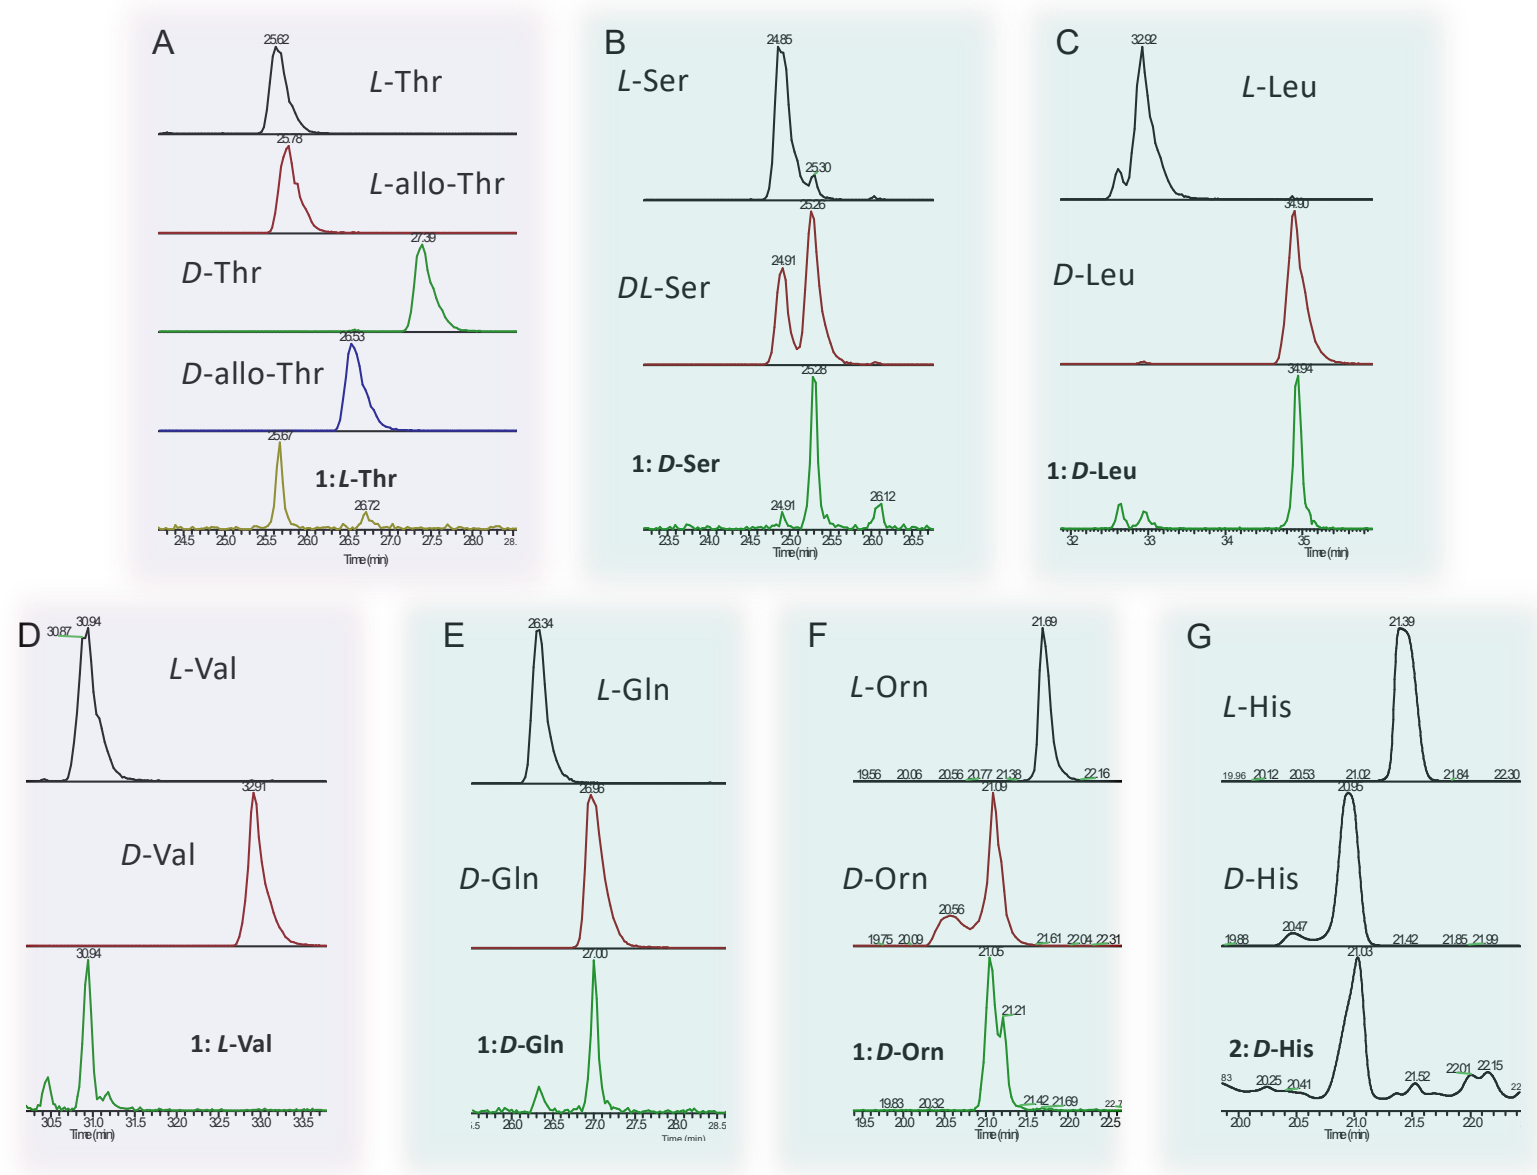

Figure S16. Extracted ion chromatograms of amino acid standards and compounds after treatment according to Marfey's method. Extracted ion chromatograms of threonine (A), serine (B), leucine (C), valine (D), glutamine (E), ornithine (F) and histidine standards (G) aligned with the hydrolysis products of **1** (A to F) and its linear form **2** (G).

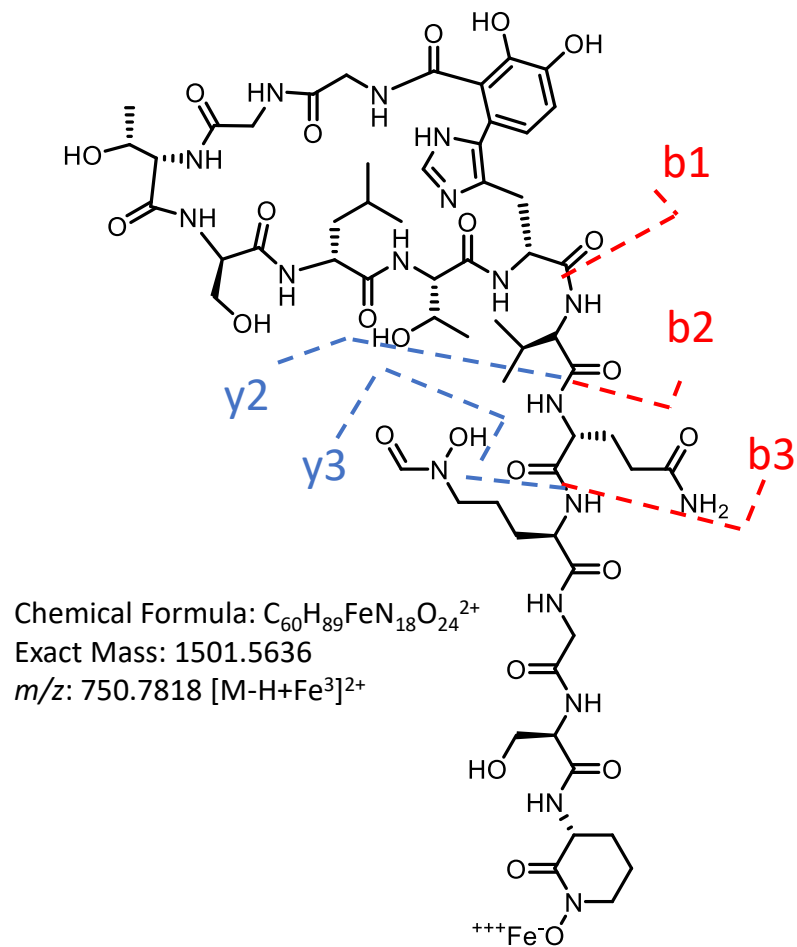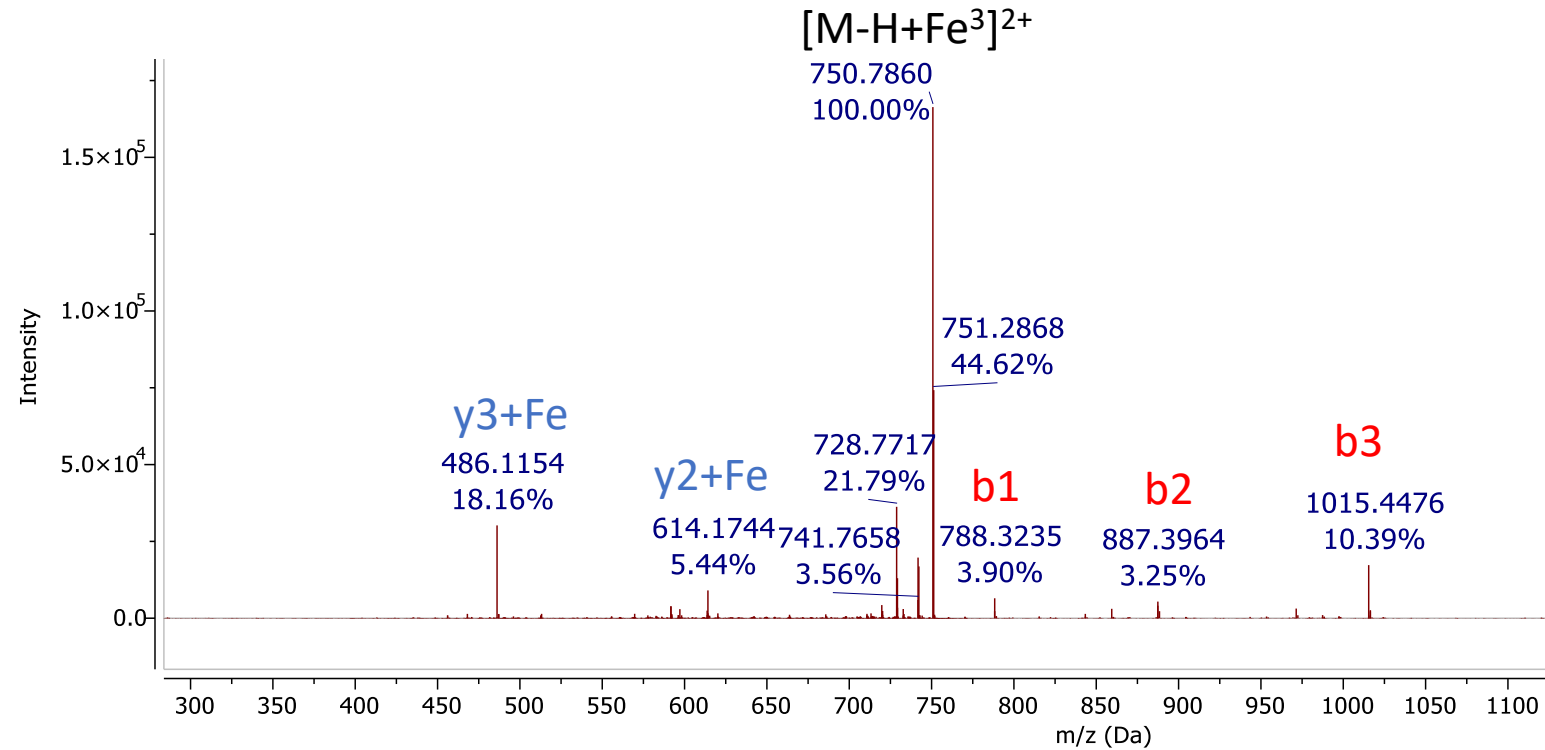

Figure S17. Iron-complexed **1**. Left: structure, chemical formula, calculated exact mass, calculated  $m/z$  of the double charged ion. Right: fragmentation pattern of  $m/z$  750.7860<sup>2+</sup> corresponding to  $[M-H+Fe^3]^{2+}$ , fragment assignment.

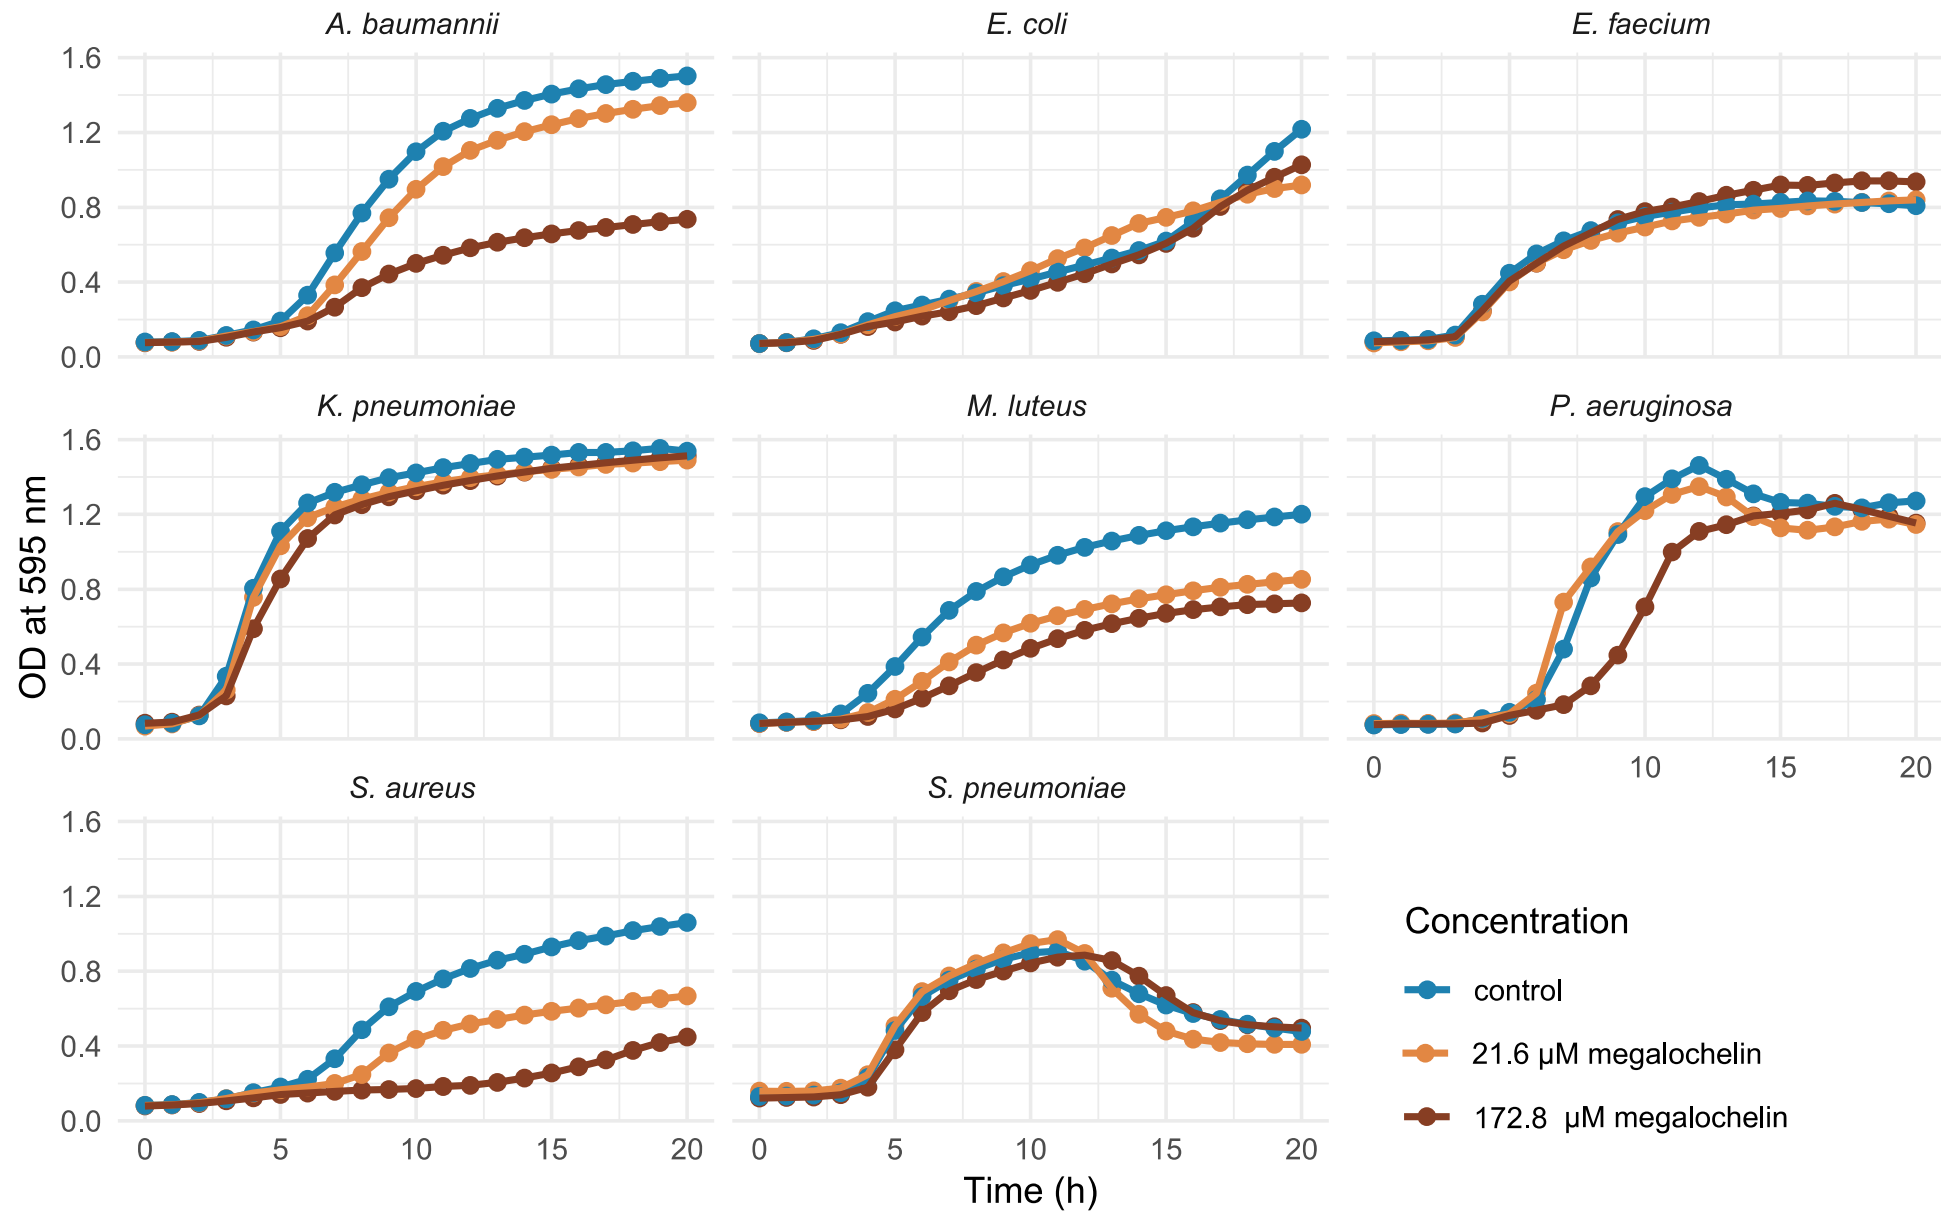

Figure S18. Growth curves of *A. baumannii*, *E. coli*, *E. faecium*, *K. pneumoniae*, *M. luteus*, *P. aeruginosa*, *S. aureus* and *S. pneumoniae* in the presence of megalochelin. The concentration of megalochelin is expressed in  $\mu\text{M}$ .

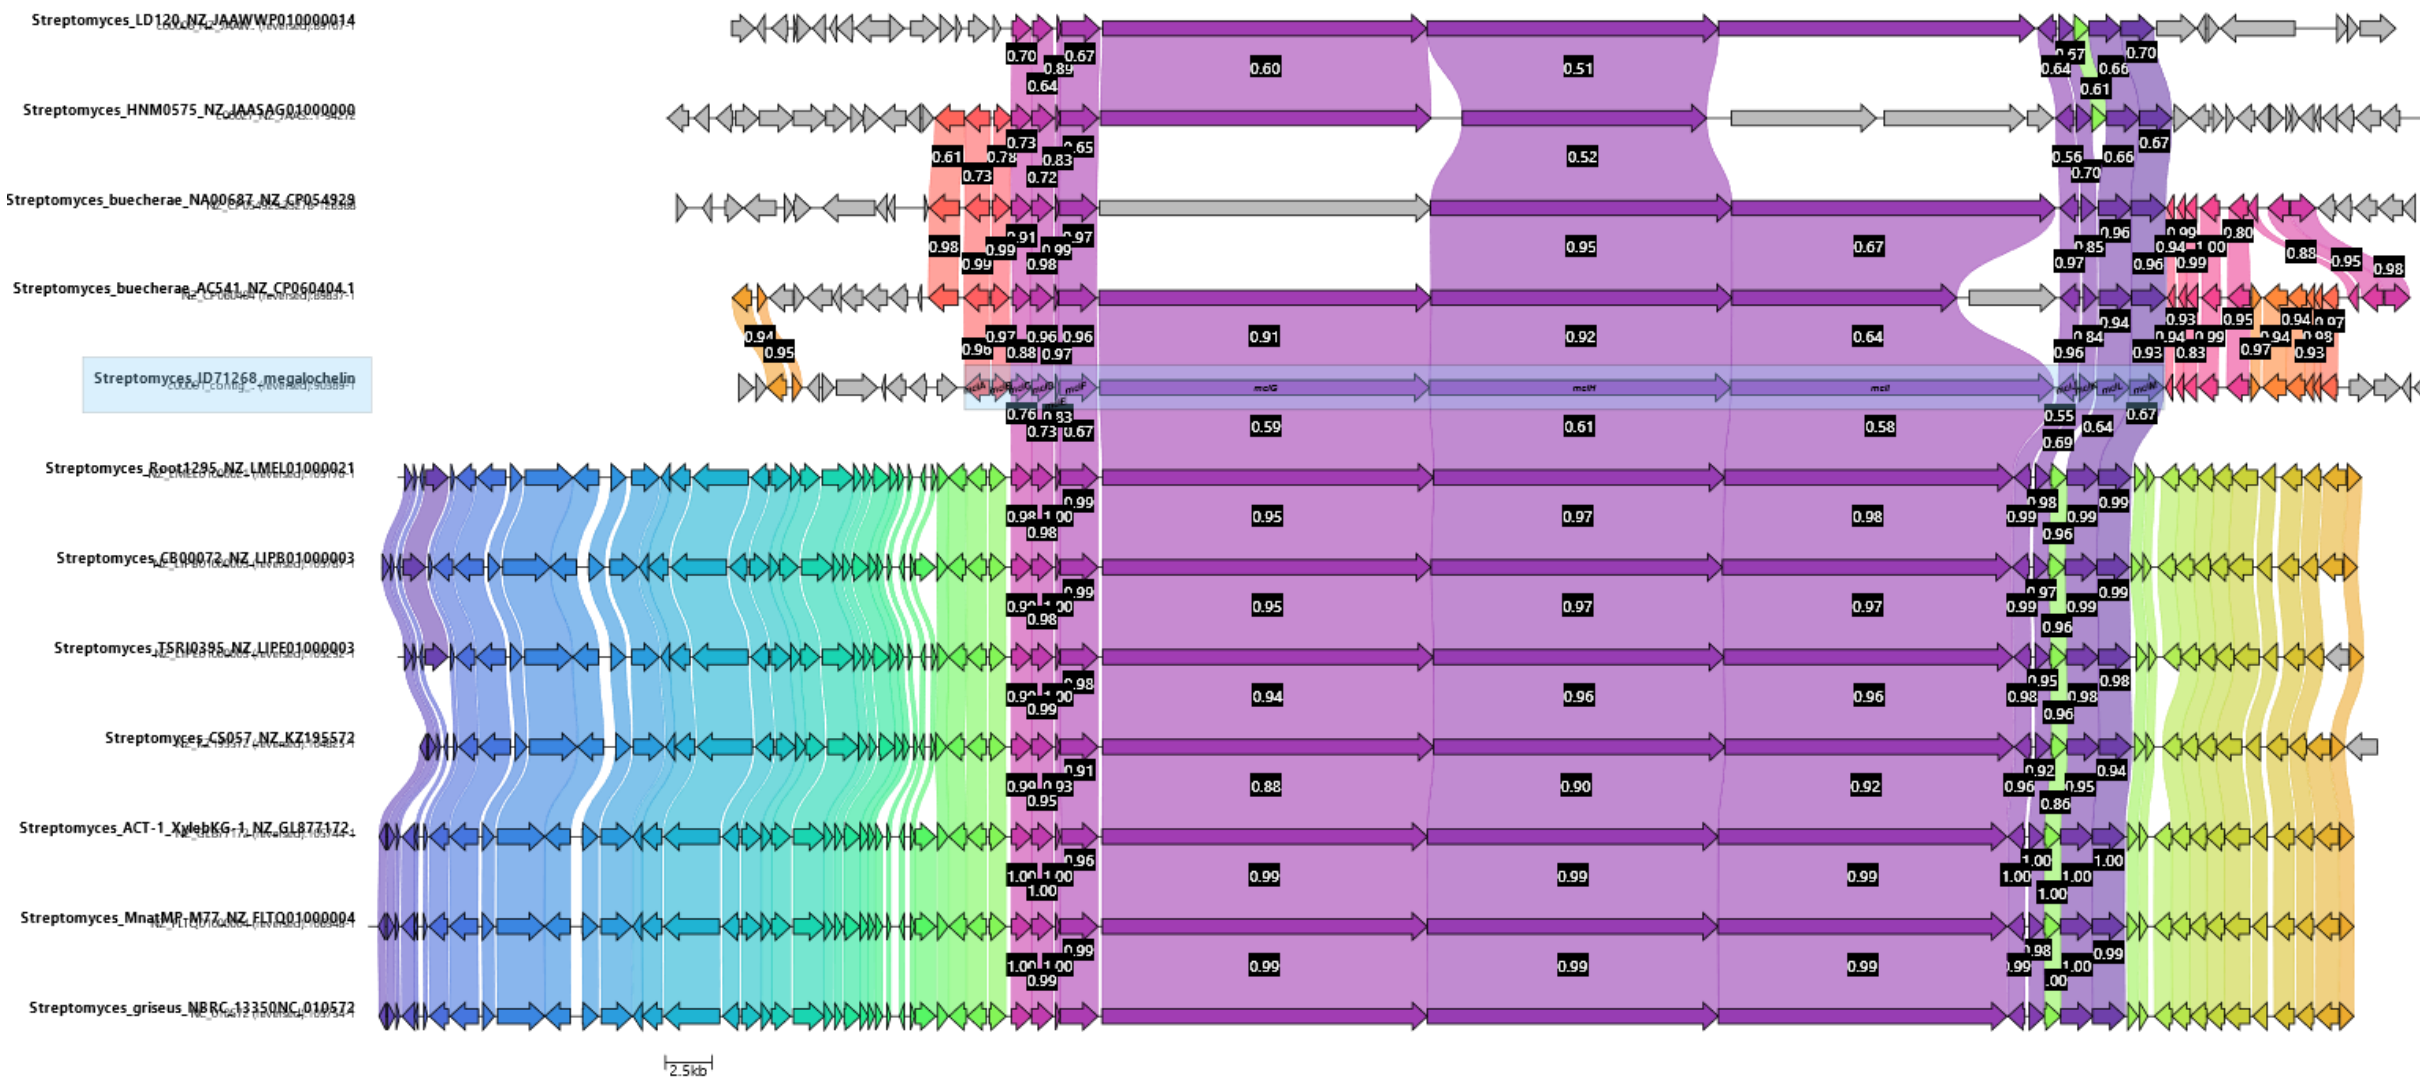

Figure S19. Comparison of megalochelin BGC comparison with similar BGCs identified in NCBI database by antiSMASH. Pairwise identity indicated between genes. Blue box defines the megalochelin BGC borders. Figure created with clinker.

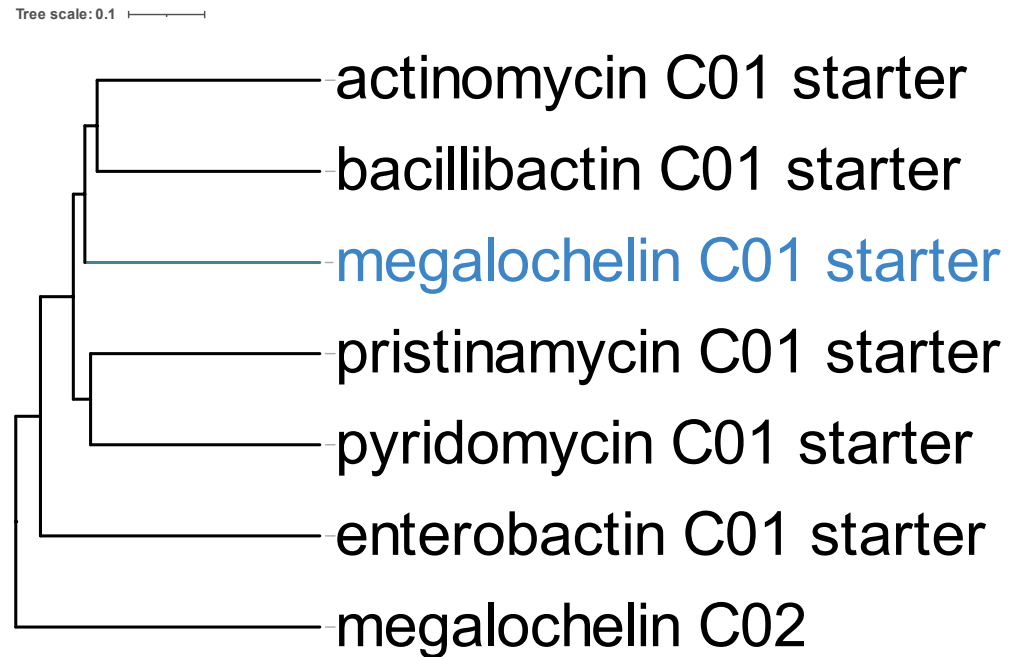

Figure S20. Amino acid sequence similarity tree comparing the starting C-domain of megalochelin BGC to starting C-domains of various metabolites incorporating DHB. Megalochelin second C-domain used as an outgroup.

Table S1. Genome properties of Streptomyces sp ID71268

| Scaffolds | CG% | Accession number          | Length bp | CDS  |
|-----------|-----|---------------------------|-----------|------|
| 1         | 73% | BioProject ID PRJNA907813 | 8379354   | 8210 |

Table S2. Genes in streptochlorin BGC

Region 5

| ID       | Length (aa) | Predicted Function                | smcogs/PFAM | E value  | Score |
|----------|-------------|-----------------------------------|-------------|----------|-------|
| ctg1_659 | 401         | Glucose / Sorbosone dehydrogenase | PF07995.13  | 8.60E-65 | 219.3 |
| ctg1_660 | 507         | FAD binding domain                | PF01565.25  | 1.10E-26 | 93.3  |
| ctg1_661 | 469         | sodium/hydrogen exchanger         | SMCOG1117   | 2.00E-96 | 317.5 |
| ctg1_662 | 594         | Tryptophan halogenase             | PF04820.16  | 2.30E-15 | 56.5  |
| ctg1_663 | 302         | no prediction                     |             |          |       |

Table S3. Genes in serpentene BGC

## Region 18

| ID        | Length (aa) | Predicted Function                                         | smcogs/PFAM | E value   | Score |
|-----------|-------------|------------------------------------------------------------|-------------|-----------|-------|
| ctg1_3564 | 245         | Archaeal transcriptional regulator TrmB                    | PF11495.10  | 0.000057  | 22.5  |
| ctg1_3565 | 299         | Recombinase                                                | PF07508.15  | 7.00E-13  | 49    |
| ctg1_3566 | 86          | FabA-like domain                                           | PF07977.15  | 5.20E-12  | 45.7  |
| ctg1_3567 | 175         | UDP-3-O-[3-hydroxymyristoyl] N-acetylglucosamine           | SMCOG1270   | 4.30E-20  | 66.4  |
| ctg1_3568 | 86          | PP-binding domain                                          | PF00550.27  | 6.50E-16  | 50.5  |
| ctg1_3569 | 403         | Beta-ketoacyl synthase                                     | SMCOG1022   | 1.60E-99  | 327.9 |
| ctg1_3570 | 390         | Beta-ketoacyl synthase                                     | SMCOG1022   | 6.60E-31  | 101.9 |
| ctg1_3571 | 405         | Beta-ketoacyl synthase                                     | SMCOG1022   | 5.70E-58  | 191.1 |
| ctg1_3572 | 304         | Beta-ketoacyl synthase                                     | PF00109.28  | 4.10E-12  | 46.3  |
| ctg1_3573 | 598         | Alpha/beta hydrolase family                                | PF12697.9   | 3E-09     | 37.9  |
| ctg1_3574 | 213         | DSBA-like thioredoxin domain                               | PF01323.22  | 2.20E-20  | 73.4  |
| ctg1_3575 | 48          | N/A                                                        |             |           |       |
| ctg1_3576 | 250         | inactive KR domain, enoyl-(Acyl carrier protein) reductase | SMCOG1001   | 1.80E-66  | 224.1 |
| ctg1_3577 | 167         | FabA-like domain                                           | PF07977.15  | 2.9E-08   | 33.5  |
| ctg1_3578 | 158         | UDP-3-O-[3-hydroxymyristoyl] N-acetylglucosamine           | SMCOG1270   | 5.40E-21  | 69.4  |
| ctg1_3579 | 426         | Beta-ketoacyl synthase                                     | SMCOG1022   | 1.10E-88  | 292.3 |
| ctg1_3580 | 127         | Beta-ketoacyl synthase                                     | PF00109.28  | 2.6E-06   | 27.3  |
| ctg1_3581 | 269         | Alpha/beta hydrolase family                                | PF12697.9   | 6.80E-11  | 43.3  |
| ctg1_3582 | 524         | Drug resistance transporter, EmrB/QacA                     | SMCOG1005   | 1.20E-123 | 407.2 |
| ctg1_3583 | 364         | malonyl CoA-acyl carrier protein transacylase              | SMCOG1021   | 6.20E-91  | 300.1 |
| ctg1_3584 | 535         | carboxyl transferase                                       | SMCOG1059   | 4.80E-219 | 722.6 |
| ctg1_3585 | 93          | Acyl-CoA carboxylase epsilon subunit                       | PF13822.8   | 5.90E-11  | 42.9  |
| ctg1_3586 | 603         | cetyl-CoA carboxylase biotin carboxylase                   | SMCOG1090   | 2.30E-206 | 681.5 |

Table S4. Genes in marinomycin BGC

| Region 29a |             |                                                                 |             |           |       |
|------------|-------------|-----------------------------------------------------------------|-------------|-----------|-------|
| ID         | Length (aa) | Predicted Function                                              | smcogs/PFAM | E value   | Score |
| ctg1_6004  | 107         | N/A                                                             |             |           |       |
| ctg1_6005  | 513         | Amino acid carrier protein                                      | SMCOG1153   | 2.20E-125 | 413   |
| ctg1_6006  | 169         | transcriptional regulator, MerR family                          | SMCOG1171   | 1.60E-29  | 97.9  |
| ctg1_6007  | 97          | viaA/B two helix domain                                         | PF05360.16  | 6.20E-17  | 61.6  |
| ctg1_6008  | 706         | SMI1 / KNR4 family (SUKH-1)                                     | PF09346.12  | 1.80E-08  | 34.9  |
| ctg1_6009  | 1119        | Peptidase_S8                                                    | PF00082.24  | 2.20E-64  | 216.2 |
| ctg1_6010  | 359         | N/A                                                             |             |           |       |
| ctg1_6011  | 310         | ABC transporter ATP-binding protein                             | SMCOG1000   | 6.10E-50  | 164.3 |
| ctg1_6012  | 153         | GntR family transcriptional regulator                           | SMCOG1136   | 9.40E-20  | 65.4  |
| ctg1_6013  | 364         | Endonuclease/Exonuclease/phosphatase family                     | PF03372.25  | 2.80E-08  | 33.7  |
| ctg1_6014  | 261         | Protein of unknown function (DUF4232)                           | PF14016.8   | 2.20E-27  | 95.9  |
| ctg1_6015  | 236         | RNase H                                                         | PF00075.26  | 2.80E-29  | 102.3 |
| ctg1_6016  | 333         | NAD-dependent epimerase/dehydratase                             | SMCOG1010   | 1.30E-26  | 88    |
| ctg1_6017  | 230         | N/A                                                             |             |           |       |
| ctg1_6018  | 434         | Beta-ketoacyl synthase                                          | SMCOG1022   | 1.30E-96  | 318.4 |
| ctg1_6019  | 316         | PKS AT domain                                                   | PF00698.23  | 1.70E-27  | 96.9  |
| ctg1_6020  | 798         | PKS AT domain                                                   | PF00698.23  | 2.10E-37  | 129.4 |
| ctg1_6021  | 272         | ECH domain                                                      | SMCOG1023   | 1.20E-64  | 212.1 |
| ctg1_6022  | 70          | N/A                                                             |             |           |       |
| ctg1_6023  | 1348        | PKS                                                             |             |           |       |
| ctg1_6024  | 2398        | PKS                                                             |             |           |       |
| ctg1_6025  | 4745        | PKS                                                             |             |           |       |
| ctg1_6026  | 3979        | PKS                                                             |             |           |       |
| ctg1_6027  | 2802        | PKS                                                             |             |           |       |
| ctg1_6028  | 1640        | PKS                                                             |             |           |       |
| ctg1_6029  | 421         | hydroxymethylglutaryl-CoA synthase                              | SMCOG1043   | 4.90E-137 | 451.2 |
| ctg1_6030  | 255         | enoyl-CoA hydratase                                             | SMCOG1023   | 3.10E-64  | 210.8 |
| ctg1_6031  | 80          | PP-binding domain                                               | PF00550.27  | 1.40E-11  | 36.6  |
| ctg1_6032  | 255         | short-chain dehydrogenase/reductase SDR                         | SMCOG1001   | 4.80E-76  | 249.7 |
| ctg1_6033  | 303         | Universal stress protein family                                 | PF00582.28  | 3.70E-16  | 60    |
| ctg1_6034  | 526         | Peptidase_S41                                                   | PF03572.20  | 2.50E-17  | 63.1  |
| ctg1_6035  | 517         | Amidohydrolase family                                           | PF01979.22  | 5.50E-06  | 26    |
| ctg1_6036  | 255         | N/A                                                             |             |           |       |
| ctg1_6037  | 416         | beta-lactamase                                                  | SMCOG1053   | 5.70E-81  | 266.2 |
| ctg1_6038  | 808         | ABC transporter ATP-binding protein                             | SMCOG1000   | 2.20E-19  | 64.4  |
| ctg1_6039  | 139         | Glyoxalase/Bleomycin resistance protein/Dioxygenase superfamily | PF00903.27  | 3.00E-15  | 56.6  |
| ctg1_6040  | 143         | AraC family transcriptional regulator                           | SMCOG1287   | 1.50E-25  | 84.2  |
| ctg1_6041  | 51          | N/A                                                             |             |           |       |
| ctg1_6042  | 418         | N/A                                                             |             |           |       |
| ctg1_6043  | 170         | N/A                                                             |             |           |       |
| ctg1_6044  | 312         | Glyoxalase/Bleomycin resistance protein/Dioxygenase superfamily | PF00903.27  | 4.20E-15  | 56.2  |
| ctg1_6045  | 96          | N/A                                                             |             |           |       |
| ctg1_6046  | 152         | THAP4-like, heme-binding beta-barrel domain                     | PF08768.13  | 4.60E-46  | 156.6 |



Table S5. Predicted Functions of Proteins Present in the Megalochelin Biosynthetic Gene Cluster of Streptomyces ID 71268

| Mcl | Length (aa) | Predicted Function                                                 | smcogs/PFAM | E value   | Score |
|-----|-------------|--------------------------------------------------------------------|-------------|-----------|-------|
| A   | 440         | lysine N(6)-hydroxylase/L-ornithine N(5)-oxygenase family protein  | SMCOG1080   | 9.50E-162 | 532.7 |
| B   | 318         | methionyl-tRNA formyltransferase                                   | SMCOG1228   | 1.50E-131 | 432.2 |
| C   | 365         | iron chelate uptake ABC transporter family permease subunit        | SMCOG1011   | 3.10E-100 | 329.5 |
| D   | 384         | iron chelate uptake ABC transporter family permease subunit        | SMCOG1011   | 3.60E-86  | 283.3 |
| E   | 72          | MbtH family protein (DmdR1 binding site on gene)                   | SMCOG1009   | 1.20E-34  | 112.1 |
| F   | 668         | multicopper oxidase domain-containing protein                      | PF07732.16  | 1.90E-18  | 66.6  |
| G   | 5883        | non-ribosomal peptide synthetase                                   |             |           |       |
| H   | 5376        | non-ribosomal peptide synthetase                                   |             |           |       |
| I   | 5768        | non-ribosomal peptide synthetase                                   |             |           |       |
| J   | 331         | ABC transporter substrate-binding protein                          | SMCOG1033   | 5.20E-57  | 187.3 |
| K   | 267         | vibriobactin utilization protein ViuB (DmdR1 binding site on gene) | SMCOG1200   | 1.10E-76  | 251.7 |
| L   | 579         | ABC transporter ATP-binding protein/permease                       | SMCOG1288   | 2.50E-131 | 433.2 |
| M   | 612         | ABC transporter ATP-binding protein/permease                       | SMCOG1288   | 7.30E-86  | 283.2 |

Table S6. Genes in BGC coding for the DHB starter unit of Megalochelin

| Region 26 |             |                                            |             |          |       |
|-----------|-------------|--------------------------------------------|-------------|----------|-------|
| ID        | Length (aa) | Predicted Function                         | smcogs/PFAM | E value  | Score |
| ctg1_5585 | 335         | iron compound ABC transporter, periplasmic | SMCOG1033   | 2.9E-76  | 250.6 |
| ctg1_5586 | 259         | short-chain dehydrogenase/reductase SDR    | SMCOG1001   | 1.9E-80  | 264.1 |
| ctg1_5587 | 461         | isochorismate synthase                     | SMCOG1018   | 6.8E-121 | 398.7 |
| ctg1_5588 | 572         | AMP-dependent synthetase and ligase        | SMCOG1002   | 6.4E-152 | 500.6 |
| ctg1_5589 | 210         | isochorismatase                            | SMCOG1027   | 5.9E-93  | 305   |
| ctg1_5590 | 76          | PP-binding                                 | PF00550.27  | 8.90E-14 | 51.7  |
| ctg1_5591 | 1451        | NRPS                                       | SMCOG1127   | 2.1E-101 | 334.4 |
| ctg1_5592 | 79          | n/a                                        |             |          |       |
| ctg1_5593 | 198         | GCN5-related N-acetyltransferase           | SMCOG1111   | 1.3E-33  | 110.6 |
| ctg1_5594 | 278         | alpha/beta hydrolase fold protein          | SMCOG1036   | 6.5E-16  | 53    |
| ctg1_5595 | 371         | transcriptional regulator, MerR family     | SMCOG1171   | 3.2E-32  | 106.6 |
